# Supplementary material for: A Systematic Review of Therapeutic Approaches Used in Experimental Models of Interstitial Cystitis/Bladder Pain Syndrome
Source: MDPI journal article supplement (doi:10.3390/biomedicines9080865), 2021-07-22
Supplement: s1 [file s1]

**Supplementary table S1: *In vitro* and *ex vivo* experimental models of IC/BPS evaluating different therapeutic options.**

| REF.                                                        | CELL TYPE                       | STIMULATION                                                                              | TREATMENT                                                                                | MAIN FINDINGS & OUTCOME                                                                                                           |
|-------------------------------------------------------------|---------------------------------|------------------------------------------------------------------------------------------|------------------------------------------------------------------------------------------|-----------------------------------------------------------------------------------------------------------------------------------|
| <b>AGENTS RECOMMENDED BY AUA GUIDELINES TO TREAT IC/BPS</b> |                                 |                                                                                          |                                                                                          |                                                                                                                                   |
| Rooney et al., 2015 [1]                                     | HTB4                            | TNF $\alpha$ (10 ng/ml), 24h<br>PS (100 ng/ml), 30 min                                   | HA (0.4 mg/ml), 24h                                                                      | decreased IL6, IL8, transepithelial permeability, increased sulfated GAG                                                          |
| Stellavato et al., 2019 [2]                                 | H-BLAK, RT112                   | TNF $\alpha$ (10 ng/ml)                                                                  | HA (0.6 and 1% w/v), CS (0.6 and 2% w/v),<br>HA + CS (1.6% +2% w/v), 4-72h               | reduced IL6, IL8, NF $\kappa$ B, increased ZO-1, cell proliferation                                                               |
| Rozenberrg et al., 2019 [3]                                 | Porcine urothelial cells        | PS (10 mg/ml), 4h                                                                        | CS (0.2% vol/vol), 7h and 24h                                                            | accelerated barrier recovery time                                                                                                 |
| Rooney et al., 2020 [4]                                     | HTB4                            | TNF $\alpha$ (10 ng/ml), 3-24h/<br>PS (100 ng/ml)/H <sub>2</sub> O <sub>2</sub> (1%), 1h | Cystistat (0.8 mg/ml HA), iAluRil (16 mg/ml HA, 20 mg/ml CS), Hyacyst (0.8 mg/ml HA), 2h | increased sulfated GAG, reduced COX-1                                                                                             |
| Rooney et al., 2020 [5]                                     | HTB2, T84                       | TNF $\alpha$ (100 ng/ml)/ PS (10 mg/ml)/H <sub>2</sub> O <sub>2</sub> (1%), 1h           | cHA:HA (1 and 3 mg/ml, 1:1, 1:10 ratio), 2-72h                                           | cHA:HA (1:1) decreased permeability, no change in IL6, IL8, MCP1; cHA:HA (1:10) increased IL6 and MCP1, no effect on permeability |
| Lee et al., 2013 [6]                                        | human urothelial cells          | LL37 (0.3-25 $\mu$ M), 15 min                                                            | GM-0111 (3 $\mu$ m), 30 min pretreatment                                                 | reduced apoptosis and ATP release                                                                                                 |
| Rajasekaran, et al. 2006 [7]                                | Rat urothelial cells            | toxic factor (2 mg/ml),<br>PS (2 mg/ml), overnight                                       | PPS (2 mg/ml), 2h premixed with toxic factor                                             | decreased cytotoxicity                                                                                                            |
| Melchior et al., 2003 [8]                                   | Rat detrusor muscle strips      | ACh (5 nM),<br>KCl (120 mM)                                                              | DMSO (25-50%), 7 min pretreatment                                                        | 40% DMSO completely blocked induced contraction, 30% DMSO decreased compliance                                                    |
| Rapp et al., 2006 [9]                                       | Whole rat bladders              | capsaicin (30 nM),<br>ATP (10 $\mu$ M)                                                   | BTX-A (50 $\mu$ M), 6h pretreatment                                                      | decreased CGRP                                                                                                                    |
| Lucioni et al., 2007 [10]                                   | Whole rat bladders              | HCl (0.4 M), 10 s                                                                        | BTX-A (10 U), 1h                                                                         | decreased CGRP and substance P                                                                                                    |
| <b>AGENTS APPROVED TO TREAT OTHER DISEASES</b>              |                                 |                                                                                          |                                                                                          |                                                                                                                                   |
| Grundy et al., 2020 [11]                                    | Whole mouse bladders            | histamine (300 $\mu$ M), 5-15 min                                                        | pyrilamine (100 $\mu$ M), 5-15 min                                                       | Reduced mechanical hypersensitivity                                                                                               |
| Zhang et al., 2017 [12]                                     | Mouse urothelial cells, NRK-52E | acrolein (100 $\mu$ M),<br>TRPV4 agonist [4 $\alpha$ -PDD12] (10 $\mu$ M), 6-12h         | CBX (10 $\mu$ M), 6-12h                                                                  | reduced cell injury, intracellular Ca <sup>2+</sup> , LDH, inhibited P38 phosphorylation                                          |
| Boudieu et al., 2019 [13]                                   | Mouse peritoneal exudate cells  | LPS (100 ng/ml), 10-90 min,<br>LPS (1 $\mu$ g/ml), 2 min                                 | pregabalin (11.3 $\mu$ M), 10-90 min or 15 min pretreatment                              | reduced $\alpha$ 2 $\delta$ -1, phospho-p65, IL6 and intracellular Ca <sup>2+</sup>                                               |

| EMERGING THERAPEUTIC OPTIONS         |                        |                                                             |                                                                                                              |                                                                                                                                                            |
|--------------------------------------|------------------------|-------------------------------------------------------------|--------------------------------------------------------------------------------------------------------------|------------------------------------------------------------------------------------------------------------------------------------------------------------|
| Xie et al., 2018 [14]                | SV-HUC-1               | TNF $\alpha$ (10 ng/ml), 24-72h                             | human umbilical cord MSC, coculture, 24-72h                                                                  | increased proliferation, p-AKT and p-mTOR, decreased apoptosis, cleaved caspase-3, IL1 $\beta$ , IL6, and TNF $\alpha$                                     |
| Wang et al., 2020 [15]               | SV-HUC-1               | LPS (10 ug/ml), ATP (2.5 mM ), 12h                          | <i>Aster tataricus</i> extract (25-100 ug/ml), 2h pretreatment                                               | Decreased cell damage, caspase-1 p20, pro-caspase-1, NLRP3, GSDMD and GSDMD-N                                                                              |
| Wang et al., 2021 [16]               | SV-HUC-1               | LPS (10 ug/ml), ATP (2.5 mM ), 12h                          | Shionone (2.5-10 $\mu$ g/ml), 2h pretreatment                                                                | increased cell viability, decreased NLRP3, caspase-1, ASC, IL1 $\beta$ , GSDMD, NF $\kappa$ B, and GSGMD-N                                                 |
| Liu et al., 2013 [17]                | human urothelial cells | stretch cycles, 24-96h                                      | EGCG (0.1-1% vol/vol), 24-96h                                                                                | decreased ATP release                                                                                                                                      |
| Chen et al., 2014 [18]               | A7R5                   | menadione (25 $\mu$ m), 30 min<br>LPS (500 ng/ml), 3h       | ECSWT (200 shots; 0.12 mJ/mm <sup>2</sup> ), 3h pretreatment                                                 | reduced TNF $\alpha$ , IL1 $\beta$ , IL6, MMP9, NF $\kappa$ B, NOX1, NOX2, and oxidative index (protein carbonyls)                                         |
| Monjotin et al., 2016 [19]           | Whole rat bladders     | thrombin (3 U/ml)/PAR1 agonist [TFLLR-NH2] (1-100 $\mu$ m)  | PAR1 agonist [F16357] (10-30 $\mu$ M), 30 min pretreatment                                                   | suppressed the maximal contraction and reduced the rhythmic instability                                                                                    |
| Yang et al., 2021 [20]               | L6-S1 rat DRG neurons  | capsaicin (1 $\mu$ M), NA                                   | adenosine A <sub>2a</sub> receptor antagonist [ZM241385] (10 $\mu$ M), 2 min pretreatment                    | inhibited Ca <sup>2+</sup> influx                                                                                                                          |
| Hayn et al., 2008 [21]               | Whole rat bladders     | capsaicin (30 nM), ATP (10 $\mu$ M), 10 min                 | CB1/CB2 agonist AJA (IP-751) (75 nm), 1h pretreatment                                                        | reduced CGRP                                                                                                                                               |
| OTHER THERAPEUTIC AGENTS AND TARGETS |                        |                                                             |                                                                                                              |                                                                                                                                                            |
| Keay et al., 2011 [22]               | Human urothelial cells | synthetic as-APF (125 nM), 48h (normal cells)               | D-proline as-APF (2.5 $\mu$ M), D-pipecolic acid as-APF (2.5 $\mu$ M), 48h-30 days (normal and IC/BPS cells) | attenuated as-APF antiproliferative activity, paracellular permeability, stimulated cell proliferation, increased ZO-1, occludin, and claudins-1, 4, 8, 12 |
| Coelho et al., 2014 [23]             | Rat urothelial cells   | NGF (100 ng/mL), 15 min, capsaicin (0.5 $\mu$ m), 15-20 min | TrkA antagonist [GW441756] (500 nM), 30 min pretreatment                                                     | decreased TRPV1 and ATP                                                                                                                                    |

**Supplementary table S2: *In vivo* experimental models of IC/BPS evaluating different therapeutic options.**

| REF.                                                        | ANIMALS                                                   | IC INDUCTION                                                                                                     | TREATMENT                                                              | MAIN FINDINGS & OUTCOME                                                          |
|-------------------------------------------------------------|-----------------------------------------------------------|------------------------------------------------------------------------------------------------------------------|------------------------------------------------------------------------|----------------------------------------------------------------------------------|
| <b>AGENTS RECOMMENDED BY AUA GUIDELINES TO TREAT IC/BPS</b> |                                                           |                                                                                                                  |                                                                        |                                                                                  |
| <b>Acute IC models</b>                                      |                                                           |                                                                                                                  |                                                                        |                                                                                  |
| Hauser et al., 2009 [24]                                    | BALB/c mice (female), SD rats (female), 300g              | HCl (10 mM), intravesically, 10 min                                                                              | CS (20 mg/ml), intravesically, 30 min                                  | restored permeability barrier                                                    |
| Yeh et al., 2010 [25]                                       | Wistar rats (female), 220-250g, n=20                      | H <sub>2</sub> O <sub>2</sub> (0.3%/1.5%), intravesically                                                        | HA (0.8 mg/ml), intravesically, 30 min                                 | attenuated bladder hyperactivity, decreased ATP and ACh                          |
| Greenwood et al., 2018 [26]                                 | SD rats (female), OVX, 220-250g                           | PS (1 mg/ml), intravesically, 10 min                                                                             | lubricin (1.2 mg/ml), intravesically                                   | decreased permeability                                                           |
| Jensen et al., 2019 [27]                                    | C57BL/6 mice (female), 8-10 weeks, n=40                   | LL-37 (320 µM), intravesically, 1h                                                                               | SAGE GM-0111 (10 mg/ml), intravesically, 5 min                         | reduced pain and inflammation                                                    |
| Towner et al., 2021 [28]                                    | SD rats (female), OVX; URO-MCP-1 transgenic mice (female) | Rats: PS (1 mg/ml), intravesically, 10 min; Mice: LPS (10 µg/ml), intravesically, 1h                             | SuperGAG (20 mg/ml), intravesically                                    | restored TEER and abrogated visceral pain in rats; restored permeability in mice |
| Lee et al., 2013 [6]                                        | C57BL/6NCRl mice (female), 8-11 weeks                     | LL-37 (250 µl), intravesically, 1h                                                                               | GM-0111 (150 µl), intravesically, 1h pretreatment                      | reduced weight loss, bladder edema, IL6, PTX3, MPO, serum amyloid P              |
| Engles et al., 2013 [29]                                    | SD rats, 300g                                             | HCl (10 mM), intravesically, 10 min                                                                              | CS (20 mg/ml), intravesically, 20 min                                  | reduced edema, mast cell, and neutrophil count                                   |
| Ottamasathien et al., 2011 [30]                             | C57BL/6 mice (female), 8-12 weeks, n=24                   | LL-37 (320 µM), intravesically, 45 min                                                                           | SAGE GM-1111 (10 mg/ml), intravesically, 45 min pre- or post-treatment | decreased PMN count, MPO                                                         |
| Rajasekaran et al., 2006 [7]                                | SD rats (male), 325-350g, adult, n=18                     | human urine toxic factor (15 mg/ml), KCl (29.8 mg/ml), intravesically, 30 min                                    | PS (10 mg/ml), premixed with stimul. agent, intravesically, 30 min     | lowered number of NVC                                                            |
| Soler et al., 2008 [31]                                     | Wistar rats (female), 180-200g, n=108                     | PS (5%), intravesically, 30 min                                                                                  | DMSO (50%), intravesically, 30 min                                     | reduced edema PMN count, urine-excreted HA                                       |
| <b>Chronic IC models</b>                                    |                                                           |                                                                                                                  |                                                                        |                                                                                  |
| Smith et al., 2005 [32]                                     | SD rats (female), 200-250g, n=24                          | PS (1%), intravesically, 30 min on day 0; CYP (150 mg/kg) i.p. every 3 <sup>rd</sup> day - total of 3 injections | BTX-A (20 U/ml), intravesically, 30 min, pretreatment                  | reduced bladder hyperactivity and ATP release                                    |
| Chuang et al., 2009 [33]                                    | SD rats (female), 220-270g, n=60                          | CYP (75 mg/kg), i.p. every 3 <sup>rd</sup> day on days 1, 4, 7                                                   | BTX-A (20 U/ml), intravesically, 1h on day 2                           | decreased bladder hyperactivity, inflammatory reaction, COX-2, EP4               |

| Acute and chronic IC models             |                                                    |                                                                                                                 |                                                                                                            |                                                                                                                                                                       |
|-----------------------------------------|----------------------------------------------------|-----------------------------------------------------------------------------------------------------------------|------------------------------------------------------------------------------------------------------------|-----------------------------------------------------------------------------------------------------------------------------------------------------------------------|
| Kim et al., 2011 [34]                   | URO-OVA/OT-1 transgenic mice (female), 8-10 weeks  | Acute: activated OT-1 splenocytes ( $1 \times 10^6$ ), i.v., chronic: spontaneous development of IC at 10 weeks | DMSO (50%), intravesically, 1h, Acute: 3x after IC induction (days 1, 4, and 7) Chronic: 1x/week, 10 weeks | reduced cellular infiltration, edema, prevented triggering of acute cystitis after transfer of OT-1 splenocytes, reduced IFN $\gamma$ , MCP1, NGF, TNF $\alpha$ , IL6 |
| AGENTS APPROVED TO TREAT OTHER DISEASES |                                                    |                                                                                                                 |                                                                                                            |                                                                                                                                                                       |
| Acute IC models                         |                                                    |                                                                                                                 |                                                                                                            |                                                                                                                                                                       |
| Boucher et al., 2008 [35]               | SD rats (female), 175-200g, n=37                   | PS (10 mg/ml), intravesically, 30 min, LPS (2 mg/ml), intravesically, 45 min                                    | nanocrystalline silver (1%), intravesically, 20 min pretreatment                                           | decreased lymphocyte and mast cell count, histamine and TNF $\alpha$                                                                                                  |
| Funahashi et al., 2014 [36]             | SD rats (female), 230-260g, n=18                   | HCl (0.1 M), intravesically, 1 min                                                                              | rebamipide (1/10 mM), intravesically, 1h, on days 1 and 4                                                  | decreased PMN cell count, edema, TNF $\alpha$ , IL1 $\beta$ , IL-6, UPK3A, urothelial permeability, nociceptive behavior, and normalized voiding parameters           |
| Zhang et al., 2017 [12]                 | C57BL/6J mice (female), 20-25g, 10-12 weeks, n=56  | CYP (150 mg/kg), i.p.                                                                                           | carbenoxolone (50 mg/kg), i.p., 1x/12h, 36h, pretreatment                                                  | normalized bladder function, reduced bladder edema, injury, COX2 and iNOS                                                                                             |
| Boudieu et al., 2019 [13]               | C57BL/6J mice (male), 20-24g, n=32                 | CYP (150 mg/kg), i.p.                                                                                           | pregabalin (30 mg/kg), s.c.                                                                                | reduced hyperactivity to von Frey filament, edema, MPO activity, IL6, KC, TNF $\alpha$ , $\alpha$ 2 $\delta$ 1 receptor subunit, inhibited NF- $\kappa$ B and ERK1/2  |
| Ichihara et al., 2017 [37]              | C57BL/6N mice (female), 19.7-19.9g                 | loxribine (4.5 M), intravesically, 1h                                                                           | hydroxychloroquine (100 mg/kg), p.o., 1x/4h, 12h, 1h pretreatment                                          | decreased voiding frequency, increased voided volume, and ICI                                                                                                         |
| Centinel et al., 2010 [38]              | Wistar albino rats (female), 180-200g, adult, n=32 | PS (5 mg/ml), intravesically, 2x in 24h                                                                         | montelukast (10 mg/kg), i.p., 2x/day, 3 days                                                               | decreased inflammatory cell infiltration, mast cell number, MDA, increased GSH                                                                                        |
| Chronic IC models                       |                                                    |                                                                                                                 |                                                                                                            |                                                                                                                                                                       |
| Holschneider et al., 2020 [39]          | Wistar-Kyoto rats (female), adult, n=20            | water avoidance stress, 1h/day, 10 days                                                                         | ceftriaxone (200 mg/kg), i.p., 1h pretreatment                                                             | decreased visceral hypersensitivity and stress-related cerebral activations within the supraspinal micturition circuit                                                |
| Bicer et al., 2015 [40]                 | BALB/cJ mice (female), 8-10 weeks, n=30            | immunization with UPK3A 65-84 (1 $\mu$ g/ $\mu$ l)                                                              | cromolyn sodium/cetirizine/ranitidine (10 mg/kg), p.o., 1x/2h, 6h                                          | reduced mechanical hyperalgesia                                                                                                                                       |
| Liu et al., 2019 [41]                   | C57BL/6 mice (female), 6-8 weeks, n=30             | emulsion of homogenized mice bladders (400 $\mu$ l), s.c., 2 weeks intervals                                    | aprepitant (1.2 mg/kg), p.o., 1x/day, 4 weeks                                                              | relieved pelvic pain, improved voiding behavior, reduced bladder edema, leukocyte infiltration, mast cells, ICAM-1                                                    |
| Yoshizumi et al., 2021 [42]             | SD rats (female), 200-300g, adult                  | LPS (1 mg/ml), intravesically, 30 min, 1x/day, 4 days                                                           | gabapentin (30-300 mg/kg), p.o./i.v.                                                                       | reduced pain-related behavior, prolonged ICI                                                                                                                          |

| OTHER INTRAVESICAL THERAPY AND IMPROVED DRUG DELIVERY SYSTEMS |                                         |                                                                            |                                                                                                   |                                                                                                                                                                                                               |
|---------------------------------------------------------------|-----------------------------------------|----------------------------------------------------------------------------|---------------------------------------------------------------------------------------------------|---------------------------------------------------------------------------------------------------------------------------------------------------------------------------------------------------------------|
| Acute IC models                                               |                                         |                                                                            |                                                                                                   |                                                                                                                                                                                                               |
| Chuang et al., 2003 [43]                                      | SD rats (female), 250-300g, n=14        | acetic acid (0.3%), intravesically                                         | POMC cDNA (100 µg/0.1 ml), direct injection into bladder wall, 3 days pretreatment                | reduced bladder hyperactivity                                                                                                                                                                                 |
| Gonzales et al., 2005 [44]                                    | C57BL6 mice (female), 10-12 weeks       | LPS (100 µg/ml), intravesically, 45 min                                    | anti-inflammatory synthetic decapeptide [RDP58] (1 mg/ml), intravesically, 30 min                 | decreased inflammation (PMN infiltrates, edema), reduced TNF- $\alpha$ , NGF, and SP production                                                                                                               |
| Tyagi et al., 2008 [45]                                       | SD rats (female), 200-250g              | PS (10 mg/ml), KCl (500 M), intravesically, 1h                             | liposomes (2 mg/ml in 500 nM KCl), intravesically, 2h                                             | reduced bladder contraction frequency                                                                                                                                                                         |
| Fraser et al., 2003 [46]                                      | SD rats (female), 250-300g, n=34        | PS (10 mg/ml)/KCl (500 mM)/acetic acid (0.1%), intravesically, 1h          | liposomes (2 mg/ml in 500 mM KCl), intravesically, 1 or 2 h, pre- or post-treatment               | reduced bladder hyperactivity                                                                                                                                                                                 |
| Tyagi et al., 2009 [47]                                       | SD rats (female), 250-300g, n=24        | PS (10 mg/ml), KCl (500 mM), intravesically, 1 h                           | liposomes (2 mg/ml in 500 mM KCl), intravesically, 2h                                             | increased ICI                                                                                                                                                                                                 |
| Konkol et al., 2016 [48]                                      | SD rats (female), 10-11 weeks, n=52     | HCl (0.4 M), intravesically, 90 s                                          | cis-UCA (2%), intravesically, 1h, 2x/day, 3 days                                                  | decreased urinary frequency and edema, increased voided volume                                                                                                                                                |
| STEM CELL THERAPY                                             |                                         |                                                                            |                                                                                                   |                                                                                                                                                                                                               |
| Acute IC models                                               |                                         |                                                                            |                                                                                                   |                                                                                                                                                                                                               |
| Song et al., 2015 [49]                                        | SD rats (female), 10 weeks, n=45        | HCl (0.1 M), intravesically, 10 min                                        | umbilical cord blood-derived MSCs (1x10 <sup>6</sup> cells) into submucosal layer of bladder wall | increased ICI and regeneration, reduced urothelial denudation, mast cell infiltration, angiogenesis, tissue fibrosis                                                                                          |
| Hirose et al., 2016 [50]                                      | F344/NS1c rats (female), 120-140g, n=60 | HCl (0.1 mol/L), intravesically, 1 min                                     | dental pulp SCs (2x10 <sup>6</sup> cells), intravesically                                         | reduced edema, submucosal hemorrhage, tissue fibrosis, mast cell count, apoptosis, MPO activity, and nociceptive behavior, increased ICI                                                                      |
| Kim et al., 2017 [51]                                         | SD rats (female), 10 weeks, n=45        | HCl (0.1 M) intravesically, 10 min                                         | hESC-derived M-MSC (2.5x10 <sup>5</sup> cells) into submucosal layer of bladder wall              | reduced non-voiding contractions, urothelial denudation, mast cell infiltration, fibrosis, apoptosis, increased regeneration                                                                                  |
| Li et al., 2017 [52]                                          | SD rats (female), 200-230g, n=60        | PS (10 mg/ml) intravesically, 30 min, LPS (2 mg/ml) intravesically, 45 min | urine-derived SC (1.2x 10 <sup>6</sup> cells), i.v.                                               | reduced urothelial ulceration, edema, hemorrhage, inflammatory cell infiltration, mast cell count, IL6, TNF $\alpha$ , NF- $\kappa$ B, caspase 3, Bax, HO-1, and NQO-1, increased Bcl-2, micturition function |

| Chronic IC models        |                                    |                                                                                                                                                  |                                                                                                                                                            |                                                                                                                                                 |
|--------------------------|------------------------------------|--------------------------------------------------------------------------------------------------------------------------------------------------|------------------------------------------------------------------------------------------------------------------------------------------------------------|-------------------------------------------------------------------------------------------------------------------------------------------------|
| Xie et al., 2018 [14]    | SD rats (female), 200-250g, n=30   | CYP (75 mg/kg), i.p., days 1, 3 and 5                                                                                                            | Umbilical cord-derived MSCs (1x10 <sup>6</sup> cells), injected through tail vein                                                                          | increased bladder voiding function, decreased submucosal edema, hemorrhage, mast cell infiltration, IL-1 $\beta$ , IL6, TNF $\alpha$            |
| Kim et al., 2020 [53]    | SD rats (female), 8 weeks, n=24    | UPK3A (200 $\mu$ g), s.c.                                                                                                                        | adipose tissue-derived MSC (1x10 <sup>6</sup> cells) into bladder wall in combination with PPS (25 mg/kg/day), p.o.                                        | reduced pain score, mast cell count, fibrosis, TNF $\alpha$ , IFN $\gamma$ , MCP, IL6, TLR2, TLR11, prolonged ICI                               |
| Inoue et al., 2019 [54]  | NOG/SCID mice (female), 6-8 weeks  | anti-asialo GM1 antibody (100 mg), i.p. and H <sub>2</sub> O <sub>2</sub> (1.5%), intravesically, 1h, dispase II (12.000 PU), intravesically, 1h | adult human dermal fibroblasts transduced with FTLK (3x10 <sup>6</sup> cells/100 $\mu$ l), intravesically, 3h                                              | <i>in vivo</i> conversion into urothelial cells and regeneration of damaged bladder tissue                                                      |
| Ryu et al., 2018 [55]    | SD rats (female), 10 weeks         | PS (10 mg), intravesically, 45 min, LPS (750 $\mu$ g), intravesically, 30 min, 1x/week, 5 weeks                                                  | hESC-derived M-MSC (1x10 <sup>6</sup> cells) into bladder wall                                                                                             | improved non-voiding contractions, reduced urothelial denudation, mast cell infiltration, and apoptosis                                         |
| Furuta et al., 2018 [56] | F344 rats (female), 160-200g, n=90 | HCl (0.1 N), intravesically, 4 min, 1x/week, 2 weeks                                                                                             | adipose tissue-derived MSC (1x10 <sup>6</sup> cells) into bladder wall                                                                                     | decreased nociceptive behavior, mast cells, collagen fibers, TNF $\alpha$ , TGF $\beta$ , normalized cystometric parameters                     |
| Chung et al., 2019 [57]  | SD rats (female), 8 weeks, n=25    | UPK2 (200 $\mu$ g), s.c.                                                                                                                         | amniotic fluid-derived/ adipose tissue-derived/bone marrow-derived/urine-derived SC (1x10 <sup>5</sup> cells), into bladder wall/tail vein/ intravesically | increased ICI, reduced voiding frequency, mast cell and T-cell infiltration, MPO, IL1 $\beta$ , IL6, IL17, TLR4, TLR5, TLR11, UPK-3, CD31, ZO-1 |
| Lee et al., 2018 [58]    | SD rats (female), 10 weeks, n=40   | ketamine hydrochloride (25 mg/kg), i.v./i.p., 2x/week, 12 weeks                                                                                  | hESC-derived M-MSC (0.25x/0.5x/1x10 <sup>6</sup> cells) into bladder wall                                                                                  | normalized cystometric parameters, reduced mast cell infiltration apoptosis, tissue fibrosis, TGF $\beta$ , SMAD, increased IL-10               |
| PLANT-BASED THERAPY      |                                    |                                                                                                                                                  |                                                                                                                                                            |                                                                                                                                                 |
| Acute IC models          |                                    |                                                                                                                                                  |                                                                                                                                                            |                                                                                                                                                 |
| Wang et al., 2020 [15]   | SD rats (female), 180-200g, n=40   | CYP (150 mg/kg), i.p., 9 days                                                                                                                    | <i>Aster tataricus</i> extract (1.2 and 2.4 g/kg), gavage, 9 days                                                                                          | reduced edema, hemorrhage, inflammation index, NLRP3, caspase-1, ASC, IL-1 $\beta$ , GSDMD, and GSGMD-N                                         |
| Wang et al., 2021 [16]   | SD rats (female), 180-200g, n=40   | CYP (150 mg/kg), i.p., 3 days                                                                                                                    | Shionone (50 and 100 mg/kg), gavage, 6 days pretreatment                                                                                                   | reduced edema, hemorrhage, NLRP3, caspase-1, ASC, IL-1 $\beta$ , NF- $\kappa$ B, GSDMD, and GSGMD-N                                             |

|                                    |                                                                                            |                                                                                                  |                                                                                                          |                                                                                                                                                                                                              |
|------------------------------------|--------------------------------------------------------------------------------------------|--------------------------------------------------------------------------------------------------|----------------------------------------------------------------------------------------------------------|--------------------------------------------------------------------------------------------------------------------------------------------------------------------------------------------------------------|
| Nassir et al., 2019 [59]           | SD rats (female), 200-250g, 4 months, n=72                                                 | water-immersion restraint stress, 30 min                                                         | <i>Olea europea</i> / <i>Juniperus procera</i> extracts (250 and 500 mg/kg), p.o.; 14 days pretreatment  | reduced mast cell infiltration, stress hormones (CRH and ACTH)                                                                                                                                               |
| <b>Chronic IC models</b>           |                                                                                            |                                                                                                  |                                                                                                          |                                                                                                                                                                                                              |
| Bazi et al., 2012 [60]             | SD rats (female), 190-225g, n=20                                                           | water avoidance stress, 2h/day, 7 days                                                           | EGCG (1 mg/kg), i.p., 7 days pretreatment                                                                | decreased micturition frequency, inflammation score, total and degranulated mast cell counts                                                                                                                 |
| Li et al., 2020 [61]               | SD rats (female), 200-250g, n=30                                                           | CYP (75 mg/kg), i.p, 1x/3 days, 10 days                                                          | <i>Houttuynia cordata</i> extract (2 mg/ml), intravesically, 1x/day, 1 week                              | decreased nociceptive behavior, inflammatory grade, mast cell number, IL6, IL8, TNF $\alpha$                                                                                                                 |
| Luo et al., 2020 [62]              | SD rats (female), 210-230g, n=80                                                           | CYP (75 mg/kg), i.p., 1x/3 days, 12 days                                                         | chlorogenic acid (100 mg/kg), i.p., 1x/day, 10 days                                                      | reduced IL6, IL1 $\beta$ , TNF $\alpha$ , apoptosis, caspase3, Bax, inhibited MAPK/NF- $\kappa$ B pathway, increased recovery of urinary function                                                            |
| Shih et al., 2021 [63]             | BALB/c mice (female), 22-26g, 8 weeks, n=18                                                | PS (1.5 mg), intravesically, 30 min, LPS (150 $\mu$ g), intravesically, 30 min, 2x/week, 5 weeks | curcumin (100 mg/kg), p.o., 5x/week, 2 weeks                                                             | decreased bladder injury and micturition, tissue fibrosis, NLRP3, ASC, IL1 $\beta$ , TGF $\beta$ 1, p-Smad2, p-Smad3                                                                                         |
| Liu et al., 2021 [64]              | SD rats (female), 250-300g, 59th–65th day, n=30                                            | zymosan (1%), intravesically, 30 min, 3x/2 weeks                                                 | <i>Bletilla striata</i> extract (25%), intravesically, 30 min, 1x/day, 7 days                            | decreased micturition interval and pain                                                                                                                                                                      |
| <b>Acute and chronic IC models</b> |                                                                                            |                                                                                                  |                                                                                                          |                                                                                                                                                                                                              |
| Ostardo et al., 2018 [65]          | Acute: SD rats (female), 200-250g, n=30<br>Chronic: CD1 mice (female), 25-30g, adult, n=30 | Acute: CYP (200 mg/kg), i.p., 4h<br>Chronic: CYP (100 mg/kg), i.p., 1x/day, 5 days               | Vessilen (2% adelmidrol + 0.1% sodium hyaluronate), intravesically, chronic: 1x/day, 1 week              | reduced bladder inflammation, pain, mechanical allodynia, mast cell and neutrophil infiltration, nitrotyrosine formation, NGF, iNOS, IL1 $\beta$ , MCP1, inhibited NF- $\kappa$ B pathway                    |
| <b>ECSWT</b>                       |                                                                                            |                                                                                                  |                                                                                                          |                                                                                                                                                                                                              |
| <b>Acute IC models</b>             |                                                                                            |                                                                                                  |                                                                                                          |                                                                                                                                                                                                              |
| Chen et al., 2014 [18]             | SD rats (male), 325-350g, adult, n=18                                                      | CYP (150 mg/kg), i.p.                                                                            | ECSWT (200 pulses, 0.11 mJ/mm <sup>2</sup> skin), surface above the urinary bladder, 3 and 24h after CYP | reduced micturition, urothelial injury, proteinuria, hematuria, infiltration of inflammatory cells, IL6, IL12, TNF $\alpha$ , NF- $\kappa$ B, MMP9, RANTES, iNOS, NOX-1, CD74, CD68, MIF, Cox-2, substance P |
| <b>Chronic IC models</b>           |                                                                                            |                                                                                                  |                                                                                                          |                                                                                                                                                                                                              |
| Li et al., 2019 [66]               | BALB/c mice (female), 5 weeks old, n=40                                                    | UPK3A (200 $\mu$ g), s.c., at 6 weeks of age, booster dose at 10 weeks of age                    | ECSWT (400 pulses, 0.09 mJ/mm <sup>2</sup> ), skin of the pelvic region, 3x/week                         | increased pain threshold, improved bladder function, decreased urinary frequency, TNF $\alpha$ , NGF                                                                                                         |

|                                                        |                                                                 |                                                                                     |                                                                                                                                           |                                                                                                                                          |
|--------------------------------------------------------|-----------------------------------------------------------------|-------------------------------------------------------------------------------------|-------------------------------------------------------------------------------------------------------------------------------------------|------------------------------------------------------------------------------------------------------------------------------------------|
| Wang et al., 2017 [67]                                 | SD rats (female), 250-300g, n= 33                               | CYP (75 mg/kg), i.p., day 1 and 4                                                   | ECSWT (300 pulses, 0.12 mJ/mm <sup>2</sup> )                                                                                              | reduced pain behavior, bladder overactivity, inflammation, NGF, IL6 COX2                                                                 |
| <b>TARGETING PAR/PURINERGIC RECEPTORS/TRP CHANNELS</b> |                                                                 |                                                                                     |                                                                                                                                           |                                                                                                                                          |
| <b>Acute IC models</b>                                 |                                                                 |                                                                                     |                                                                                                                                           |                                                                                                                                          |
| Monjotin et al., 2016 [19]                             | SD rats Wistar Han rats (female), 200–250g, n=76                | CYP (150 mg/kg), i.p.                                                               | selective PAR1 agonist [F166357] (30 uM), intravesically, 1h                                                                              | restored the physiological urodynamic profile and mean voided volume, reduced micturition frequency, increased individual voided volumes |
| Kouzoukas et al., 2015 [68]                            | C57BL/6 mice (female), 13 weeks, n=52                           | PAR-activating peptide [TFLLR-NH2, AYPGKF-NH2] (100 uM, 150 ul), intravesically, 1h | MIF antagonist [ISO-1] (20 mg/kg), intravesically, 15 min pretreatment                                                                    | prevented PAR4- and reduced PAR1-induced mechanical hypersensitivity, reduced MIF                                                        |
| Kouzoukas et al., 2016 [69]                            | C57BL/6 mice (female), 13-17 weeks                              | AYPGKF-NH2 (100 µM, 150 µl), intravesically, 1h                                     | ISO-1 (20 mg/kg), i.p., HMGB1 antagonist [glycyrrhizin] (50 mg/kg), i.p.                                                                  | prevented mechanical hypersensitivity                                                                                                    |
| Ma et al., 2019 [70]                                   | C57/BL6 (male&female)                                           | CYP (300 mg/kg), i.p.                                                               | ISO-1 (20 mg/kg), i.p., 10 min pre-/24h post-treatment                                                                                    | increase micturition volume, reduced micturition frequency and bladder inflammation                                                      |
| Irie et al., 2020 [71]                                 | ddY mice (female), 18-22g, 4–5 weeks, n=38                      | substance P (6 nmol, 200 µL), intravesically, 24h                                   | anti-HMGB1 Ab (1 mg/kg, i.p., 20 µg, intravesically)                                                                                      | reduced referred hyperalgesia/allodynia, bladder swelling                                                                                |
| Tanaka et al., 2014 [72]                               | ddY mice (female), 18-22g, 4-5 weeks                            | CYP (150 mg/kg), i.p.                                                               | rhsTM (0.1 - 10 mg/kg), i.p., anti-HMGB1 Ab (1 mg/kg) i.p., 30 min pretreatment                                                           | prevented CYP-induced nociceptive behaviour                                                                                              |
| Beckel et al., 2015 [73]                               | SD rats (female), n=45; Long-Evans rats (female), n=3, 225-275g | LPS (100 ug/ml), intravesically                                                     | Pannexin 1 channels antagonist [BB-FCF] (1-100 µM)                                                                                        | decreased ATP                                                                                                                            |
| Arronson et al., 2012 [74]                             | SD rats (male), 300–400g, n=54                                  | CYP (100 mg/kg), i.p.                                                               | P1A1 rec. ant. [DPCPX] (1mg/kg)/P1A2B rec. ant. [PSB11 15] (1 mg/kg)/P2 rec. ant. [suramin] (10 mg/kg), i.p., 1x/day, 5 days pretreatment | DPCPX suppressed submucosal thickening, muscarinic M5 receptor, detrusor mast cell infiltration                                          |
| <b>Chronic IC models</b>                               |                                                                 |                                                                                     |                                                                                                                                           |                                                                                                                                          |
| Yang et al., 2021 [20]                                 | SD rats (female), 250g                                          | CYP (75 mg/kg), i.p., 1x/3 days, 7 days.                                            | A2a rec. ant. [ZM241385] (10 µg), intrathecal injection                                                                                   | prevented bladder overactivity and hyperalgesia                                                                                          |
| Ko et al., 2021 [75]                                   | SD rats (female), 240-260g, 12 weeks, n = 40                    | CYP (75 mg/kg), i.p., 1x/3 days, 9 days                                             | A2a rec. agonist [PDRN] (8 mg/kg), i.p., 1x/day                                                                                           | decreased contraction pressure and time, inflammatory score, TNFα, IL1β, IκB-α phosphorylation, suppressed NF-κB and MAPK                |



|                                         |                                                                                                       |                                                                                                         |                                                                                                                                                                        |                                                                                                                                                                         |
|-----------------------------------------|-------------------------------------------------------------------------------------------------------|---------------------------------------------------------------------------------------------------------|------------------------------------------------------------------------------------------------------------------------------------------------------------------------|-------------------------------------------------------------------------------------------------------------------------------------------------------------------------|
|                                         |                                                                                                       |                                                                                                         |                                                                                                                                                                        | pathway, inhibited DNA fragmentation, increased ICI                                                                                                                     |
| deBerry et al., 2015 [76]               | C57BL/6 mice (female), 8-12 weeks                                                                     | CYP (100 mg/kg), i.p., 1x/2 days, 5 days                                                                | $\alpha$ -artemin (10 mg/kg), i.p., 30 min pre-/post-treatment                                                                                                         | blocked and reversed mechanical hyperalgesia, decreased TRPA1 and ERK phosphorylation                                                                                   |
| Merrill et al., 2014 [77]               | Wistar rats (male), 300-350g, adult                                                                   | repeated variate stress (7 days)                                                                        | TRPV4 antagonist [HC067047] (1 $\mu$ M), intravesically, 30 min                                                                                                        | Improved bladder capacity and ICI, increased voided volume                                                                                                              |
| <b>Acute and chronic IC models</b>      |                                                                                                       |                                                                                                         |                                                                                                                                                                        |                                                                                                                                                                         |
| Kawasaki et al., 2021 [78]              | C57BL6 mice (male), 5-6 weeks                                                                         | acute: CYP (300 mg/kg), i.p.<br>chronic: CYP (150 mg/kg), i.p., 4 days                                  | TRPV4 ant. [compound X] (0.03 - 10 mg/kg), [GSK 2193874] (50 mg/kg), p.o.                                                                                              | reduced nociceptive pain, mechanical hypersensitivity                                                                                                                   |
| <b>TARGETING microRNA</b>               |                                                                                                       |                                                                                                         |                                                                                                                                                                        |                                                                                                                                                                         |
| <b>Acute IC models</b>                  |                                                                                                       |                                                                                                         |                                                                                                                                                                        |                                                                                                                                                                         |
| Hou et al., 2020 [79]                   | SD rats (female), n=70                                                                                | CYP (100 mg/kg) i.p., PS (10 mg/kg), LPS (2 mg/kg), intravesically                                      | miR-495 mimic (4 mg/kg plasmids), i.p., 10 D                                                                                                                           | decreased mast cell count, fibrosis, IL6, IL8, IL10, IL-7, TNF $\alpha$ , JAK3                                                                                          |
| Song et al. 2019 [80]                   | SD rats (female), 250-300g, 12 weeks, n=70                                                            | PS (10 mg/ml) intravesically, 45 min, LPS (750 $\mu$ g/ml), intravesically., 30 min; repeated after 24h | miR-132 inhibitor (5 $\mu$ l), i.p./JAK-STAT inhibitor [AG490] (5 $\mu$ l), i.p.                                                                                       | reduced inflammatory cell infiltration, fibrosis, mast cell numbers, IL6, IL10, IFN $\gamma$ , TNF $\alpha$ , ICAM1, improved bladder capacity, basal and peak pressure |
| <b>TARGETING THE CANNABINOID SYSTEM</b> |                                                                                                       |                                                                                                         |                                                                                                                                                                        |                                                                                                                                                                         |
| <b>Acute IC models</b>                  |                                                                                                       |                                                                                                         |                                                                                                                                                                        |                                                                                                                                                                         |
| Wang et al., 2013 [81]                  | C57BL/6NH mice (female), 10-12 weeks                                                                  | acrolein (1 mM), intravesically                                                                         | CB2 agonist [GP1a] (1-10 mg/kg), s.c., 10 min pretreatment                                                                                                             | decreased bladder weight and mechanical sensitivity, inhibited phosphorylation of ERK1/2                                                                                |
| Wang et al., 2014 [82]                  | C57BL/6NH mice (female), 10-12 weeks                                                                  | acrolein (0.5 mM), intravesically, 40 min                                                               | CB2 agonist [GP1a] (10 mg/kg), i.p.                                                                                                                                    | decreased bladder weight, edema, peripheral sensitivity to mechanical stimuli, number of urine spots                                                                    |
| Tambaro et al., 2014 [83]               | CD-1 mice (male), 25-35g                                                                              | LPS (25 mg/kg), i.p.                                                                                    | CB2 agonist [JWH015] (5 mg/kg), i.p., 3 min pretreatment/4h post-treatment                                                                                             | reduced MPO activity, leukocyte infiltration, IL1 $\alpha$ , IL1 $\beta$ , and TNF $\alpha$                                                                             |
| Berger et al., 2019 [84]                | CD-1 mice (female), 27-33g, n=29 for i.p. LPS BALB/c mice (female), 17-23g, n=22 for intravesical LPS | LPS (20 mg/kg), i.p./LPS (150 $\mu$ g/ml), intravesically                                               | CB2 agonist [HU308] (5 mg/kg), i.p. 30 min post-treatment/ CB2 agonist [BCP] (100 mg/kg), intravesically, 30 min post treatment/BCP (100 mg/kg), p.o., 1h pretreatment | reduced number of adherent leukocytes in bladder venules, inflammation, mechanical allodynia                                                                            |

|                                             |                                                  |                                                             |                                                                                                                             |                                                                                                                                |
|---------------------------------------------|--------------------------------------------------|-------------------------------------------------------------|-----------------------------------------------------------------------------------------------------------------------------|--------------------------------------------------------------------------------------------------------------------------------|
| Pessina et al., 2015 [85]                   | Wistar rats (female), 200-240g, n=132            | CYP (200 mg/kg), i.p.                                       | CB1 and CB2 agonist [palmitoylethanolamide] (5-20 mg/kg), i.p., 30 min pretreatment                                         | attenuated pain behavior and reduced number of voiding episodes                                                                |
| Liu et al., 2020 [86]                       | C57BL/6J mice (female), 10-13 weeks              | CYP (150 mg/kg), i.p.                                       | selective CB2 agonist [JWH-133] (1 mg/kg), i.p., 30 min pretreatment                                                        | reduced mechanical hyperalgesia, number of void spots, IL1 $\beta$ , TNF $\alpha$ , IL8, oxidative stress, increased autophagy |
| <b>OTHER THERAPEUTIC AGENTS and TARGETS</b> |                                                  |                                                             |                                                                                                                             |                                                                                                                                |
| <b>Acute IC models</b>                      |                                                  |                                                             |                                                                                                                             |                                                                                                                                |
| Shimizu et al., 2013 [87]                   | SD rats (female), 200-250g, 11 weeks             | HCl (0.4 M), intravesically, 90 s                           | hydroxyfasudil (10 mg/kg), i.p., 1x/day, 7 days                                                                             | increased ICI, reduced edema, neutrophil infiltration, cellular proliferation, inhibited RhoA/ROCK signaling                   |
| de Oliveira et al., 2016 [88]               | C57BL/6 mice (female), 20-25g, 10 weeks          | CYP (300 mg/kg), i.p.                                       | sGC activator [BAY 58-2667] (1 mg/kg), p.o., pretreatment                                                                   | increased micturition volume, normalized basal pressure, voiding frequency, NVC, ICI, reduced ROS                              |
| Liu et al., 2015 [89]                       | SD rats (male), 6-8 weeks                        | CYP (150 mg/kg), i.p.                                       | NMDAR antagonists [MK-801] (3 mg/kg)/[AP5] (5 mg/kg), i.v./PI3K inhibitor [LY294002] (50 $\mu$ g/kg), i.v.                  | reduced bladder hypertrophy, voiding frequency, and urine output, increased ICI                                                |
| Lai et al., 2017 [90]                       | C57BL/6J mice (female), 18-23g, 8-10 weeks, n=27 | CYP (150 mg/kg), i.p.                                       | anti-VEGF antibodies (10 mg/kg), i.p., 36 h pretreatment                                                                    | reduced pelvic hypersensitivity                                                                                                |
| Chen et al., 2020 [91]                      | SD rats (female), 225-250g, 6-8 weeks, n=30      | CYP (150 mg/kg), i.p.                                       | platelet-rich plasma (0.3 ml) alone or in combination with HA (1 mg/ml), intravesically, 1 h                                | increased voiding interval, ZO-1, reduced bladder edema and IL6                                                                |
| Majima et al., 2017 [92]                    | SD rats (female), 9 weeks                        | H <sub>2</sub> O <sub>2</sub> (1.5%) intravesically, 10 min | liposomes with NGF antisense oligonucleotide [OND] (12 $\mu$ M), intravesically                                             | reduced ICI, bladder weight, nociceptive behavior, inflammatory cell infiltration, NGF and TRPV1                               |
| Hu et al., 2005 [93]                        | Wistar rats (female), adult                      | CYP (150 mg/kg), i.p.                                       | recombinant NGF sequestering protein trkA Ig2 [REN1820] (200 $\mu$ g), i.v. on day 1 and 2                                  | decreased bladder overactivity (ICI, NVC, decreased voiding frequency), absent changes in behavior                             |
| Tyagi et al., 2006 [94]                     | SD rats, 150-200g                                | CYP (100 mg/kg), i.p.                                       | NGF antisense [TAT-PNA: peptide nucleic acid, conjugated to TAT protein] (100 $\mu$ M), intravesically, 30 min pretreatment | reduced bladder contraction frequency, NGF                                                                                     |

|                           |                                       |                                                                                                                                 |                                                                                                              |                                                                                                                                                                                                              |
|---------------------------|---------------------------------------|---------------------------------------------------------------------------------------------------------------------------------|--------------------------------------------------------------------------------------------------------------|--------------------------------------------------------------------------------------------------------------------------------------------------------------------------------------------------------------|
| Coelho et al., 2015 [23]  | SD rats (female), 250-300g, n=66      | CYP (150 mg/kg), i.p.                                                                                                           | TrkA antagonist [GW441756] (0.5 mg), i.p., 24 h pretreatment and 1x/day                                      | prevented pain behavior and mechanical hyperalgesia, NGF                                                                                                                                                     |
| <b>Chronic IC models</b>  |                                       |                                                                                                                                 |                                                                                                              |                                                                                                                                                                                                              |
| Zeybek et al., 2007 [95]  | Wistar rats (female), 200-250g, adult | water avoidance stress, 2h/day, 5 days                                                                                          | taurine (50 mg/kg), i.p., pretreatment                                                                       | retained urothelial integrity, decreased mast cell count, MDA, increased GSH                                                                                                                                 |
| Benigni et al., 2006 [96] | BALB/c mice (female), 18-20g, 8 weeks | immunisation with chicken ovalbumin (10 µg/animal) i.p. 1x/week, 4 weeks, ovalbumin (1 mg/150 µl) intravesically, 2x for 30 min | vitamin D3 analogue [BXL628] (30, 75 µg/kg), p.o., 1x/day, 8-12 days                                         | reduced edema, mast cell, eosinophil and lymphomononuclear cell numbers, IL13, MMCP4, FcεRIα                                                                                                                 |
| Akin et al., 2015 [97]    | SD rats (female), 8 weeks             | PS (5 mg/ml), intravesically, 2x/day, 3 days                                                                                    | hydroxyfasudil (10 mg/kg), i.p.                                                                              | reduced micturition frequency, inflammation, degeneration, LOX, normalized urine volume, increased GSH, CAT and SOD activity                                                                                 |
| Zhang et al, 2016 [98]    | SD rats (female), 250-300g            | CYP (150 mg/kg), i.p., PS (30 mg/ml, 0.5 ml), intravesically, 30 min, LPS (2 mg/ml), intravesically, 45 min; repeated on day 3  | anti-ICAM antibody (0,5 mg/ml), i.p., 1 h post-treatment, day 1 and 3                                        | decreased inflammation grade and mast cell count, reduced expression of P2X2/P2X3 receptors, PGE2, EP1/EP2 receptors, NK1R, TNFα and ICAM1                                                                   |
| Minami et al., 2019 [99]  | ICR mice (female), 6 weeks, n=16      | H <sub>2</sub> O <sub>2</sub> (1.5 %), intravesically, 20 min, repeated on days 1 and 3                                         | hyperbaric oxygen (hyperbaric chamber, pressure 0.2 ATA, 100% O <sub>2</sub> inflow), 30 min on days 4 and 7 | improved urinary frequency and tidal voiding volume, reduced bladder weight, edema, leukocyte infiltration, vasodilatation, urothelial permeability, IL6, IL1β, TNFα, TRPV1, TRPV4, fibrosis, increased eNOS |
| Mahal et al., 2018 [100]  | SD rats (female), 6 weeks, n=24       | CYP (50 mg/kg), i.p., 2x/week, 2 weeks                                                                                          | PPAR-γ agonist [pioglitazone] (15 mg/kg), gastric gavage, 1x/day, 2 weeks                                    | improved bladder function, reduced urinary frequency, increased cystometric capacity, improved urothelial structural integrity                                                                               |

**Supplementary Table S3: Methodological quality and reported measures undertaken to avoid bias.**

A 12-point quality control checklist was generated based on published ARRIVE guidelines describing the minimum information that all scientific publications reporting research using animals should include.

**Methodological quality**

1. Number of experimental and control groups
2. Number of animals
3. Species and strain
4. Sex of the animals
5. Age of the animals
6. Weight of the animals
7. Housing and husbandry
8. Drug formulation, dose, site and route of administration

**Risk of bias:**

9. Sample size calculation
10. Randomization into groups
11. Blinded caretaker/investigator
12. Blinded assessment of outcome

|                                 | METHODOLOGICAL QUALITY                                      |     |     |     |     |     |    |     | RISK OF BIAS |    |    |    |       |
|---------------------------------|-------------------------------------------------------------|-----|-----|-----|-----|-----|----|-----|--------------|----|----|----|-------|
| Reference                       | 1                                                           | 2   | 3   | 4   | 5   | 6   | 7  | 8   | 9            | 10 | 11 | 12 | SCORE |
|                                 | <b>Agents recommended by AUA guidelines to treat IC/BPS</b> |     |     |     |     |     |    |     |              |    |    |    |       |
| Hauser et al., 2009 [24]        | no                                                          | no  | yes | yes | no  | no  | no | yes | no           | no | no | no | 3     |
| Yeh et al., 2010 [25]           | yes                                                         | yes | yes | yes | no  | yes | no | yes | no           | no | no | no | 6     |
| Greenwood et al., 2018 [26]     | no                                                          | no  | yes | yes | no  | yes | no | yes | no           | no | no | no | 4     |
| Jensen et al., 2019 [27]        | yes                                                         | yes | yes | yes | yes | no  | no | yes | no           | no | no | no | 6     |
| Towner et al., 2020 [28]        | no                                                          | no  | yes | yes | no  | no  | no | yes | no           | no | no | no | 3     |
| Lee et al., 2013 [6]            | yes                                                         | yes | yes | yes | yes | no  | no | yes | no           | no | no | no | 6     |
| Engles et al., 2013 [29]        | no                                                          | no  | yes | no  | no  | no  | no | yes | no           | no | no | no | 2     |
| Ottamasathien et al., 2011 [30] | yes                                                         | yes | yes | yes | yes | no  | no | yes | no           | no | no | no | 6     |

|                                |                                                                      |     |     |     |     |     |     |     |    |     |    |     |   |
|--------------------------------|----------------------------------------------------------------------|-----|-----|-----|-----|-----|-----|-----|----|-----|----|-----|---|
| Rajasekaran et al., 2006 [7]   | yes                                                                  | yes | yes | yes | no  | yes | no  | yes | no | no  | no | no  | 6 |
| Soler et al., 2008 [31]        | yes                                                                  | yes | yes | yes | no  | yes | no  | yes | no | no  | no | no  | 6 |
| Smith et al., 2005 [32]        | yes                                                                  | yes | yes | yes | no  | yes | no  | yes | no | no  | no | no  | 6 |
| Chuang et al., 2009 [33]       | yes                                                                  | yes | yes | yes | no  | yes | no  | yes | no | no  | no | no  | 6 |
| Kim et al., 2011 [34]          | no                                                                   | no  | yes | yes | yes | no  | no  | yes | no | no  | no | no  | 4 |
|                                | <b>Agents approved to treat other diseases</b>                       |     |     |     |     |     |     |     |    |     |    |     |   |
| Boucher et al., 2008 [35]      | yes                                                                  | yes | yes | yes | no  | yes | no  | yes | no | no  | no | no  | 6 |
| Funahashi et al., 2014 [36]    | yes                                                                  | yes | yes | yes | no  | yes | no  | yes | no | no  | no | yes | 7 |
| Zhang et al., 2017 [12]        | yes                                                                  | yes | yes | yes | yes | yes | no  | yes | no | no  | no | no  | 7 |
| Boudieu et al., 2019 [13]      | yes                                                                  | yes | yes | yes | no  | yes | no  | yes | no | no  | no | no  | 6 |
| Ichihara et al., 2017 [37]     | no                                                                   | no  | yes | yes | no  | yes | no  | yes | no | no  | no | no  | 4 |
| Cetinel et al., 2010 [38]      | yes                                                                  | yes | yes | yes | no  | yes | yes | yes | no | no  | no | yes | 8 |
| Holschneider et al., 2020 [39] | no                                                                   | yes | yes | yes | no  | no  | yes | yes | no | no  | no | no  | 5 |
| Bicer et al., 2014 [40]        | yes                                                                  | yes | yes | yes | yes | no  | no  | yes | no | no  | no | no  | 6 |
| Liu et al., 2019 [41]          | yes                                                                  | yes | yes | yes | yes | no  | no  | yes | no | yes | no | yes | 8 |
| Yoshizumi et al., 2021 [42]    | no                                                                   | no  | yes | yes | no  | yes | no  | yes | no | no  | no | no  | 4 |
|                                | <b>Other intravesical therapy and improved drug delivery systems</b> |     |     |     |     |     |     |     |    |     |    |     |   |
| Chuang et al., 2003 [43]       | yes                                                                  | yes | yes | yes | no  | yes | no  | yes | no | no  | no | no  | 6 |
| Gonzales et al., 2005 [44]     | no                                                                   | yes | yes | yes | yes | no  | no  | yes | no | no  | no | no  | 5 |
| Tyagi et al., 2008 [45]        | no                                                                   | no  | yes | yes | no  | yes | no  | yes | no | no  | no | no  | 4 |
| Fraser et al., 2003 [46]       | yes                                                                  | yes | yes | yes | no  | yes | no  | yes | no | no  | no | no  | 6 |
| Tyagi et al., 2009 [47]        | yes                                                                  | yes | yes | yes | no  | yes | no  | yes | no | yes | no | no  | 7 |
| Konkol et al., 2015 [48]       | yes                                                                  | yes | yes | yes | yes | no  | no  | yes | no | no  | no | yes | 7 |
|                                | <b>Stem cell therapy</b>                                             |     |     |     |     |     |     |     |    |     |    |     |   |
| Song et al., 2015 [49]         | yes                                                                  | yes | yes | yes | yes | no  | no  | yes | no | no  | no | no  | 6 |

|                            |                                                        |     |     |     |     |     |     |     |     |     |     |     |    |
|----------------------------|--------------------------------------------------------|-----|-----|-----|-----|-----|-----|-----|-----|-----|-----|-----|----|
| Hirose et al., 2016 [50]   | yes                                                    | yes | yes | yes | no  | yes | no  | yes | no  | no  | yes | no  | 7  |
| Kim et al., 2017 [51]      | yes                                                    | yes | yes | yes | yes | no  | no  | yes | no  | yes | yes | yes | 10 |
| Li et al., 2017 [52]       | yes                                                    | yes | yes | yes | no  | yes | no  | yes | no  | yes | no  | yes | 8  |
| Xie et al., 2018 [14]      | yes                                                    | yes | yes | yes | no  | yes | no  | yes | no  | no  | no  | no  | 6  |
| Kim et al., 2020 [53]      | yes                                                    | yes | yes | yes | yes | no  | no  | yes | no  | no  | no  | no  | 6  |
| Inoue et al., 2019 [54]    | no                                                     | no  | yes | yes | yes | no  | no  | yes | no  | no  | no  | no  | 4  |
| Ryu et al., 2018 [55]      | no                                                     | no  | yes | yes | yes | no  | no  | yes | no  | no  | no  | no  | 4  |
| Furuta et al., 2018 [56]   | yes                                                    | yes | yes | yes | no  | yes | no  | yes | no  | no  | no  | no  | 6  |
| Chung et al., 2020 [57]    | yes                                                    | yes | yes | yes | yes | no  | no  | yes | no  | no  | no  | no  | 7  |
| Lee et al., 2018 [58]      | yes                                                    | yes | yes | yes | yes | no  | no  | yes | no  | no  | no  | no  | 6  |
|                            | <b>Plant-based therapy</b>                             |     |     |     |     |     |     |     |     |     |     |     |    |
| Wang et al., 2020 [15]     | yes                                                    | yes | yes | yes | no  | yes | yes | yes | no  | no  | no  | no  | 7  |
| Wang et al., 2021 [16]     | yes                                                    | yes | yes | yes | no  | yes | yes | yes | no  | no  | no  | no  | 7  |
| Nassir et al., 2019 [59]   | yes                                                    | yes | yes | yes | yes | yes | yes | yes | no  | yes | no  | no  | 9  |
| Bazi et al., 2012 [60]     | yes                                                    | yes | yes | yes | no  | yes | no  | yes | no  | yes | no  | yes | 8  |
| Li et al., 2020 [61]       | yes                                                    | yes | yes | yes | no  | yes | no  | yes | no  | yes | no  | yes | 8  |
| Luo et al., 2020 [62]      | yes                                                    | yes | yes | yes | no  | yes | no  | yes | no  | yes | no  | no  | 7  |
| Shih et al., 2021 [63]     | yes                                                    | yes | yes | yes | yes | yes | no  | yes | no  | no  | no  | no  | 7  |
| Liu et al., 2021 [64]      | yes                                                    | yes | yes | yes | yes | yes | no  | yes | no  | yes | no  | no  | 8  |
| Ostardo et al., 2018 [65]  | yes                                                    | yes | yes | yes | no  | yes | no  | yes | no  | yes | no  | yes | 8  |
|                            | <b>ECSWT</b>                                           |     |     |     |     |     |     |     |     |     |     |     |    |
| Chen et al., 2014 [18]     | yes                                                    | yes | yes | yes | no  | yes | no  | yes | no  | yes | no  | no  | 7  |
| Li et al., 2019 [66]       | yes                                                    | yes | yes | yes | yes | no  | no  | yes | no  | no  | no  | no  | 6  |
| Wang et al., 2017 [67]     | yes                                                    | yes | yes | yes | no  | yes | no  | yes | no  | no  | yes | no  | 7  |
|                            | <b>Targeting PAR/purinergic receptors/TRP channels</b> |     |     |     |     |     |     |     |     |     |     |     |    |
| Monjotin et al., 2016 [19] | yes                                                    | yes | yes | yes | no  | yes | yes | yes | yes | yes | no  | yes | 10 |

|                               |                                             |     |     |     |     |     |     |     |    |     |     |     |   |
|-------------------------------|---------------------------------------------|-----|-----|-----|-----|-----|-----|-----|----|-----|-----|-----|---|
| Kouzoukas et al., 2015 [68]   | yes                                         | yes | yes | yes | yes | no  | no  | yes | no | no  | no  | yes | 7 |
| Kouzoukas et al., 2016 [69]   | yes                                         | no  | yes | yes | yes | no  | no  | yes | no | no  | no  | yes | 6 |
| Ma et al., 2019 [70]          | no                                          | no  | yes | yes | no  | no  | no  | yes | no | no  | yes | no  | 4 |
| Irie et al., 2020 [71]        | yes                                         | yes | yes | yes | yes | yes | no  | yes | no | no  | no  | no  | 7 |
| Tanaka et al., 2014 [72]      | no                                          | no  | yes | yes | yes | yes | no  | yes | no | no  | no  | no  | 5 |
| Beckel et al., 2015 [73]      | no                                          | yes | yes | yes | no  | yes | no  | yes | no | no  | no  | no  | 5 |
| Aronsson et al., 2012 [74]    | no                                          | yes | yes | yes | no  | yes | no  | yes | no | no  | no  | no  | 5 |
| Yang et al., 2021 [20]        | no                                          | no  | yes | yes | no  | no  | no  | yes | no | no  | no  | no  | 3 |
| Ko et al., 2021 [75]          | yes                                         | yes | yes | yes | yes | yes | no  | yes | no | yes | no  | no  | 8 |
| DeBerry et al., 2015 [76]     | no                                          | no  | yes | yes | yes | no  | no  | yes | no | yes | no  | yes | 6 |
| Merrill et al., 2014 [77]     | yes                                         | yes | yes | yes | no  | yes | no  | yes | no | no  | no  | no  | 6 |
| Kawasaki et al., 2021 [78]    | no                                          | no  | yes | yes | yes | no  | no  | yes | no | no  | no  | no  | 4 |
|                               | <b>Targeting microRNAs</b>                  |     |     |     |     |     |     |     |    |     |     |     |   |
| Hou et al., 2021 [79]         | yes                                         | yes | no  | yes | no  | no  | no  | yes | no | no  | no  | no  | 4 |
| Song et al., 2019 [80]        | yes                                         | yes | yes | yes | yes | yes | no  | yes | no | yes | no  | no  | 8 |
|                               | <b>Targeting the cannabinoid system</b>     |     |     |     |     |     |     |     |    |     |     |     |   |
| Wang et al., 2013 [81]        | yes                                         | yes | yes | yes | yes | no  | no  | yes | no | no  | no  | yes | 7 |
| Wang et al., 2014 [82]        | no                                          | yes | yes | yes | yes | no  | no  | yes | no | no  | no  | yes | 6 |
| Tambaro et al., 2014 [83]     | no                                          | yes | yes | yes | no  | yes | yes | yes | no | no  | no  | no  | 6 |
| Berger et al., 2019 [84]      | yes                                         | yes | yes | yes | no  | yes | no  | yes | no | no  | no  | no  | 6 |
| Pessina et al., 2015 [85]     | no                                          | yes | yes | yes | no  | yes | yes | yes | no | no  | no  | no  | 6 |
| Liu et al., 2019 [86]         | yes                                         | yes | yes | yes | yes | no  | no  | yes | no | yes | no  | no  | 7 |
|                               | <b>Other therapeutic agents and targets</b> |     |     |     |     |     |     |     |    |     |     |     |   |
| Shimizu et al., 2013 [87]     | yes                                         | yes | yes | yes | yes | yes | no  | yes | no | yes | no  | no  | 8 |
| de Oliveira et al., 2016 [88] | yes                                         | yes | yes | yes | yes | yes | no  | yes | no | no  | no  | no  | 7 |

|                           |     |     |     |     |     |     |    |     |    |     |    |     |   |
|---------------------------|-----|-----|-----|-----|-----|-----|----|-----|----|-----|----|-----|---|
| Liu et al., 2015 [89]     | no  | yes | yes | yes | yes | no  | no | yes | no | no  | no | no  | 5 |
| Lai et al., 2017 [90]     | yes | yes | yes | yes | yes | yes | no | yes | no | no  | no | no  | 7 |
| Chen et al., 2020 [91]    | yes | yes | yes | yes | yes | yes | no | yes | no | yes | no | no  | 8 |
| Majima et al., 2017 [92]  | yes | yes | yes | yes | yes | no  | no | yes | no | no  | no | yes | 7 |
| Hu et al., 2005 [93]      | yes | yes | yes | yes | no  | no  | no | yes | no | no  | no | no  | 5 |
| Tyagi et al., 2006 [94]   | no  | no  | yes | no  | no  | yes | no | no  | no | no  | no | no  | 2 |
| Coelho et al., 2014 [23]  | yes | yes | yes | yes | no  | yes | no | yes | no | no  | no | yes | 7 |
| Zeybek et al., 2007 [95]  | no  | no  | yes | yes | no  | yes | no | yes | no | no  | no | no  | 4 |
| Benigni et.al., 2006 [96] | yes | yes | yes | yes | yes | yes | no | yes | no | no  | no | yes | 8 |
| Akin et al., 2015 [97]    | yes | yes | yes | yes | yes | yes | no | yes | no | no  | no | no  | 8 |
| Zhang et al., 2016 [98]   | yes | yes | yes | yes | no  | yes | no | yes | no | no  | no | no  | 6 |
| Minami et al., 2018 [99]  | yes | yes | yes | yes | yes | no  | no | yes | no | no  | no | no  | 6 |
| Mahal et al., 2018 [100]  | yes | yes | yes | yes | yes | no  | no | yes | no | no  | no | no  | 6 |
| Total (n)                 | 63  | 70  | 88  | 86  | 41  | 53  | 8  | 88  | 1  | 18  | 4  | 18  |   |



## References

1. Rooney, P.; Srivastava, A.; Watson, L.; Quinlan, L.R.; Pandit, A. Hyaluronic acid decreases IL-6 and IL-8 secretion and permeability in an inflammatory model of interstitial cystitis. *Acta Biomater* **2015**, *19*, 66-75, doi:10.1016/j.actbio.2015.02.030.
2. Stellavato, A.; Pirozzi, A.V.A.; Diana, P.; Reale, S.; Vassallo, V.; Fusco, A.; Donnarumma, G.; De Rosa, M.; Schiraldi, C. Hyaluronic acid and chondroitin sulfate, alone or in combination, efficiently counteract induced bladder cell damage and inflammation. *PLoS One* **2019**, *14*, e0218475, doi:10.1371/journal.pone.0218475.
3. Rozenberg, B.B.; Janssen, D.A.W.; Jansen, C.F.J.; Schalken, J.A.; Heesakkers, J. Improving the barrier function of damaged cultured urothelium using chondroitin sulfate. *Neurourol Urodyn* **2020**, *39*, 558-564, doi:10.1002/nau.24240.
4. Rooney, P.; Ryan, C.; McDermott, B.J.; Dev, K.; Pandit, A.; Quinlan, L.R. Effect of Glycosaminoglycan Replacement on Markers of Interstitial Cystitis In Vitro. *Front Pharmacol* **2020**, *11*, 575043, doi:10.3389/fphar.2020.575043.
5. Rooney, P.R.; Kannala, V.K.; Kotla, N.G.; Benito, A.; Dupin, D.; Loinaz, I.; Quinlan, L.R.; Rochev, Y.; Pandit, A. A high molecular weight hyaluronic acid biphasic dispersion as potential therapeutics for interstitial cystitis. *J Biomed Mater Res B Appl Biomater* **2021**, *109*, 864-876, doi:10.1002/jbm.b.34751.
6. Lee, W.Y.; Savage, J.R.; Zhang, J.X.; Jia, W.J.; Ottamasathien, S.; Prestwich, G.D. Prevention of Anti-microbial Peptide LL-37-Induced Apoptosis and ATP Release in the Urinary Bladder by a Modified Glycosaminoglycan. *Plos One* **2013**, *8*, doi:10.1371/journal.pone.0077854.
7. Rajasekaran, M.; Stein, P.; Parsons, C.L. Toxic factors in human urine that injure urothelium. *Int J Urol* **2006**, *13*, 409-414, doi:10.1111/j.1442-2042.2006.01301.x.
8. Melchior, D.; Packer, C.S.; Johnson, T.C.; Kaefer, M. Dimethyl sulfoxide: does it change the functional properties of the bladder wall? *J Urol* **2003**, *170*, 253-258, doi:10.1097/01.ju.0000071520.73686.3d.
9. Rapp, D.E.; Turk, K.W.; Bales, G.T.; Cook, S.P. Botulinum toxin type a inhibits calcitonin gene-related peptide release from isolated rat bladder. *J Urol* **2006**, *175*, 1138-1142, doi:10.1016/s0022-5347(05)00322-8.
10. Lucioni, A.; Bales, G.T.; Lotan, T.L.; McGehee, D.S.; Cook, S.P.; Rapp, D.E. Botulinum toxin type A inhibits sensory neuropeptide release in rat bladder models of acute injury and chronic inflammation. *BJU Int* **2008**, *101*, 366-370, doi:10.1111/j.1464-410X.2007.07312.x.
11. Grundy, L.; Caldwell, A.; Garcia Caraballo, S.; Erickson, A.; Schober, G.; Castro, J.; Harrington, A.M.; Brierley, S.M. Histamine induces peripheral and central hypersensitivity to bladder distension via the histamine H(1) receptor and TRPV1. *Am J Physiol Renal Physiol* **2020**, *318*, F298-f314, doi:10.1152/ajprenal.00435.2019.
12. Zhang, X.L.; Gao, S.; Tanaka, M.; Zhang, Z.; Huang, Y.R.; Mitsui, T.; Kamiyama, M.; Koizumi, S.; Fan, J.L.; Takeda, M., et al. Carbenoxolone inhibits TRPV4 channel-initiated oxidative urothelial injury and ameliorates cyclophosphamide-induced bladder dysfunction. *Journal of Cellular and Molecular Medicine* **2017**, *21*, 1791-1802, doi:10.1111/jcmm.13100.
13. Boudieu, L.; Mountadem, S.; Lashermes, A.; Meleine, M.; Ulmann, L.; Rassendren, F.; Aissouni, Y.; Sion, B.; Carvalho, F.A.; Ardid, D. Blocking  $\alpha(2)\delta-1$  Subunit Reduces Bladder Hypersensitivity and Inflammation in a Cystitis Mouse Model by Decreasing NF-kB Pathway Activation. *Front Pharmacol* **2019**, *10*, 133, doi:10.3389/fphar.2019.00133.
14. Xie, J.; Liu, B.; Chen, J.; Xu, Y.; Zhan, H.; Yang, F.; Li, W.; Zhou, X. Umbilical cord-derived mesenchymal stem cells alleviated inflammation and inhibited apoptosis in interstitial cystitis via AKT/mTOR signaling pathway. *Biochem Biophys Res Commun* **2018**, *495*, 546-552, doi:10.1016/j.bbrc.2017.11.072.
15. Wang, X.; Fan, L.; Yin, H.; Zhou, Y.; Tang, X.; Fei, X.; Tang, H.; Peng, J.; Ren, X.; Xue, Y., et al. Protective effect of Aster tataricus extract on NLRP3-mediated pyroptosis of bladder urothelial cells. *J Cell Mol Med* **2020**, *24*, 13336-13345, doi:10.1111/jcmm.15952.
16. Wang, X.; Yin, H.; Fan, L.; Zhou, Y.Q.; Tang, X.L.; Fei, X.J.; Tang, H.L.; Peng, J.; Zhang, J.J.; Xue, Y., et al. Shionone alleviates NLRP3 inflammasome mediated pyroptosis in interstitial cystitis injury. *International Immunopharmacology* **2021**, *90*, doi:10.1016/j.intimp.2020.107132.
17. Liu, M.; Xu, Y.F.; Feng, Y.; Yang, F.Q.; Luo, J.; Zhai, W.; Che, J.P.; Wang, G.C.; Zheng, J.H. Epigallocatechin gallate attenuates interstitial cystitis in human bladder urothelium cells by modulating purinergic receptors. *J Surg Res* **2013**, *183*, 397-404, doi:10.1016/j.jss.2012.11.041.

18. Chen, Y.T.; Yang, C.C.; Sun, C.K.; Chiang, H.J.; Chen, Y.L.; Sung, P.H.; Zhen, Y.Y.; Huang, T.H.; Chang, C.L.; Chen, H.H., et al. Extracorporeal shock wave therapy ameliorates cyclophosphamide-induced rat acute interstitial cystitis through inhibiting inflammation and oxidative stress-in vitro and in vivo experiment studies. *American Journal of Translational Research* **2014**, *6*, 631-648.
19. Monjot, N.; Gillespie, J.; Farrié, M.; Le Grand, B.; Junquero, D.; Vergnolle, N. F16357, a novel protease-activated receptor 1 antagonist, improves urodynamic parameters in a rat model of interstitial cystitis. *British Journal of Pharmacology* **2016**, 10.1111/bph.13501, 2224-2236, doi:10.1111/bph.13501.
20. Yang, Y.; Zhang, H.; Lu, Q.; Liu, X.; Fan, Y.; Zhu, J.; Sun, B.; Zhao, J.; Dong, X.; Li, L. Suppression of adenosine A(2a) receptors alleviates bladder overactivity and hyperalgesia in cyclophosphamide-induced cystitis by inhibiting TRPV1. *Biochem Pharmacol* **2021**, *183*, 114340, doi:10.1016/j.bcp.2020.114340.
21. Hayn, M.H.; Ballesteros, I.; de Miguel, F.; Coyle, C.H.; Tyagi, S.; Yoshimura, N.; Chancellor, M.B.; Tyagi, P. Functional and immunohistochemical characterization of CB1 and CB2 receptors in rat bladder. *Urology* **2008**, *72*, 1174-1178, doi:10.1016/j.urology.2008.03.044.
22. Keay, S.; Kaczmarek, P.; Zhang, C.O.; Koch, K.; Szekely, Z.; Barchi, J.J., Jr.; Michejda, C. Normalization of proliferation and tight junction formation in bladder epithelial cells from patients with interstitial cystitis/painful bladder syndrome by d-proline and d-pipecolic acid derivatives of antiproliferative factor. *Chem Biol Drug Des* **2011**, *77*, 421-430, doi:10.1111/j.1747-0285.2011.01108.x.
23. Coelho, A.; Wolf-Johnston, A.S.; Shinde, S.; Cruz, C.D.; Cruz, F.; Avelino, A.; Bird, L.A. Urinary bladder inflammation induces changes in urothelial nerve growth factor and TRPV1 channels. *Br J Pharmacol* **2015**, *172*, 1691-1699, doi:10.1111/bph.12958.
24. Hauser, P.J.; Bueth, D.A.; Califano, J.; Sofinowski, T.M.; Culkin, D.J.; Hurst, R.E. Restoring barrier function to acid damaged bladder by intravesical chondroitin sulfate. *J Urol* **2009**, *182*, 2477-2482, doi:10.1016/j.juro.2009.07.013.
25. Yeh, C.H.; Chiang, H.S.; Chien, C.T. Hyaluronic acid ameliorates bladder hyperactivity via the inhibition of H<sub>2</sub>O<sub>2</sub>-enhanced purinergic and muscarinic signaling in the rat. *Neurourol Urodyn* **2010**, *29*, 765-770, doi:10.1002/nau.20830.
26. Greenwood-Van Meerveld, B.; Mohammadi, E.; Latorre, R.; Truitt, E.R., 3rd; Jay, G.D.; Sullivan, B.D.; Schmidt, T.A.; Smith, N.; Saunders, D.; Ziegler, J., et al. Preclinical Animal Studies of Intravesical Recombinant Human Proteoglycan 4 as a Novel Potential Therapy for Diseases Resulting From Increased Bladder Permeability. *Urology* **2018**, *116*, 230.e231-230.e237, doi:10.1016/j.urology.2018.02.034.
27. Jensen, M.M.; Jia, W.; Schults, A.J.; Isaacson, K.J.; Steinhilber, D.; Green, B.; Zachary, B.; Cappello, J.; Ghandehari, H.; Oottamasathien, S. Temperature-responsive silk-elastinlike protein polymer enhancement of intravesical drug delivery of a therapeutic glycosaminoglycan for treatment of interstitial cystitis/painful bladder syndrome. *Biomaterials* **2019**, *217*, 119293, doi:10.1016/j.biomaterials.2019.119293.
28. Towner, R.A.; Greenwood-Van Meerveld, B.; Mohammadi, E.; Saunders, D.; Smith, N.; Sant, G.R.; Shain, H.C.; Jozefiak, T.H.; Hurst, R.E. SuperGAG biopolymers for treatment of excessive bladder permeability. *Pharmacol Res Perspect* **2021**, *9*, e00709, doi:10.1002/prp2.709.
29. Engles, C.D.; Hauser, P.J.; Abdullah, S.N.; Culkin, D.J.; Hurst, R.E. Intravesical chondroitin sulfate inhibits recruitment of inflammatory cells in an acute acid damage "leaky bladder" model of cystitis. *Urology* **2012**, *79*, 483.e413-487, doi:10.1016/j.urology.2011.10.010.
30. Oottamasathien, S.; Jia, W.J.; McCoard, L.; Slack, S.; Zhang, J.X.; Skardal, A.; Job, K.; Kennedy, T.P.; Dull, R.O.; Prestwich, G.D. A Murine Model of Inflammatory Bladder Disease: Cathelicidin Peptide Induced Bladder Inflammation and Treatment With Sulfated Polysaccharides. *Journal of Urology* **2011**, *186*, 1684-1692, doi:10.1016/j.juro.2011.03.099.
31. Soler, R.; Bruschini, H.; Truzzi, J.C.; Martins, J.R.; Camara, N.O.; Alves, M.T.; Leite, K.R.; Nader, H.B.; Srougi, M.; Ortiz, V. Urinary glycosaminoglycans excretion and the effect of dimethyl sulfoxide in an experimental model of non-bacterial cystitis. *Int Braz J Urol* **2008**, *34*, 503-511; discussion 511, doi:10.1590/s1677-55382008000400013.
32. Smith, C.P.; Vemulakonda, V.M.; Kiss, S.; Boone, T.B.; Somogyi, G.T. Enhanced ATP release from rat bladder urothelium during chronic bladder inflammation: Effect of botulinum toxin A. *Neurochemistry International* **2005**, *47*, 291-297, doi:10.1016/j.neuint.2005.04.021.

33. Chuang, Y.C.; Yoshimura, N.; Huang, C.C.; Wu, M.; Chiang, P.H.; Chancellor, M.B. Intravesical botulinum toxin A administration inhibits COX-2 and EP4 expression and suppresses bladder hyperactivity in cyclophosphamide-induced cystitis in rats. *Eur Urol* **2009**, *56*, 159-166, doi:10.1016/j.eururo.2008.05.007.
34. Kim, R.; Liu, W.; Chen, X.; Kreder, K.J.; Luo, Y. Intravesical dimethyl sulfoxide inhibits acute and chronic bladder inflammation in transgenic experimental autoimmune cystitis models. *J Biomed Biotechnol* **2011**, *2011*, 937061, doi:10.1155/2011/937061.
35. Boucher, W.; Stern, J.M.; Kotsinyan, V.; Kempuraj, D.; Papaliodis, D.; Cohen, M.S.; Theoharides, T.C. Intravesical nanocrystalline silver decreases experimental bladder inflammation. *J Urol* **2008**, *179*, 1598-1602, doi:10.1016/j.juro.2007.11.037.
36. Funahashi, Y.; Yoshida, M.; Yamamoto, T.; Majima, T.; Takai, S.; Gotoh, M. Intravesical application of rebamipide promotes urothelial healing in a rat cystitis model. *J Urol* **2014**, *192*, 1864-1870, doi:10.1016/j.juro.2014.06.081.
37. Ichihara, K.; Aizawa, N.; Akiyama, Y.; Kamei, J.; Masumori, N.; Andersson, K.E.; Homma, Y.; Igawa, Y. Toll-like receptor 7 is overexpressed in the bladder of Hunner-type interstitial cystitis, and its activation in the mouse bladder can induce cystitis and bladder pain. *Pain* **2017**, *158*, 1538-1545, doi:10.1097/j.pain.0000000000000947.
38. Çetinel, S.; Çanilloğlu, Y.E.; Çikler, E.; Sener, G.; Ercan, F. Leukotriene D4 receptor antagonist montelukast alleviates protamine sulphate-induced changes in rat urinary bladder. *BJU Int* **2011**, *107*, 1320-1325, doi:10.1111/j.1464-410X.2010.09532.x.
39. Holschneider, D.P.; Wang, Z.; Chang, H.Y.; Zhang, R.; Gao, Y.L.; Guo, Y.M.; Mao, J.; Rodriguez, L.V. Ceftriaxone inhibits stress-induced bladder hyperalgesia and alters cerebral micturition and nociceptive circuits in the rat: A multidisciplinary approach to the study of urologic chronic pelvic pain syndrome research network study. *Neurourology and Urodynamics* **2020**, *39*, 1628-1643, doi:10.1002/nau.24424.
40. Bicer, F.; Altuntas, C.Z.; Izgi, K.; Ozer, A.; Kavran, M.; Tuohy, V.K.; Daneshgari, F. Chronic pelvic allodynia is mediated by CCL2 through mast cells in an experimental autoimmune cystitis model. *Am J Physiol Renal Physiol* **2015**, *308*, F103-113, doi:10.1152/ajprenal.00202.2014.
41. Liu, B.K.; Jin, X.W.; Lu, H.Z.; Zhang, X.; Zhao, Z.H.; Shao, Y. The Effects of Neurokinin-1 Receptor Antagonist in an Experimental Autoimmune Cystitis Model Resembling Bladder Pain Syndrome/Interstitial Cystitis. *Inflammation* **2019**, *42*, 246-254, doi:10.1007/s10753-018-0888-2.
42. Yoshizumi, M.; Watanabe, C.; Mizoguchi, H. Gabapentin reduces painful bladder hypersensitivity in rats with lipopolysaccharide-induced chronic cystitis. *Pharmacol Res Perspect* **2021**, *9*, e00697, doi:10.1002/prp2.697.
43. Chuang, Y.C.; Chou, A.K.; Wu, P.C.; Chiang, P.H.; Yu, T.J.; Yang, L.C.; Yoshimura, N.; Chancellor, M.B. Gene therapy for bladder pain with gene gun particle encoding pro-opiomelanocortin cDNA. *J Urol* **2003**, *170*, 2044-2048, doi:10.1097/01.ju.0000092945.76827.47.
44. Gonzalez, R.R.; Fong, T.; Belmar, N.; Saban, M.; Felsen, D.; Te, A. Modulating bladder neuro-inflammation: RDP58, a novel anti-inflammatory peptide, decreases inflammation and nerve growth factor production in experimental cystitis. *J Urol* **2005**, *173*, 630-634, doi:10.1097/01.ju.0000143192.68223.f7.
45. Tyagi, P.; Chancellor, M.; Yoshimura, N.; Huang, L. Activity of different phospholipids in attenuating hyperactivity in bladder irritation. *BJU Int* **2008**, *101*, 627-632, doi:10.1111/j.1464-410X.2007.07334.x.
46. Fraser, M.O.; Chuang, Y.C.; Tyagi, P.; Yokoyama, T.; Yoshimura, N.; Huang, L.; De Groat, W.C.; Chancellor, M.B. Intravesical liposome administration--a novel treatment for hyperactive bladder in the rat. *Urology* **2003**, *61*, 656-663, doi:10.1016/s0090-4295(02)02281-1.
47. Tyagi, P.; Hsieh, V.C.; Yoshimura, N.; Kaufman, J.; Chancellor, M.B. Instillation of liposomes vs dimethyl sulphoxide or pentosan polysulphate for reducing bladder hyperactivity. *BJU Int* **2009**, *104*, 1689-1692, doi:10.1111/j.1464-410X.2009.08673.x.
48. Konkol, Y.; Bernoulli, J.; Streng, T.; Jääskeläinen, K.; Laihia, J.; Leino, L. Intravesical treatment with cis-urocanic acid improves bladder function in rat model of acute bladder inflammation. *Neurourol Urodyn* **2016**, *35*, 786-791, doi:10.1002/nau.22818.
49. Song, M.; Lim, J.; Yu, H.Y.; Park, J.; Chun, J.Y.; Jeong, J.; Heo, J.; Kang, H.; Kim, Y.; Cho, Y.M., et al. Mesenchymal Stem Cell Therapy Alleviates Interstitial Cystitis by Activating Wnt Signaling Pathway. *Stem Cells and Development* **2015**, *24*, 1648-1657, doi:10.1089/scd.2014.0459.
50. Hirose, Y.; Yamamoto, T.; Nakashima, M.; Funahashi, Y.; Matsukawa, Y.; Yamaguchi, M.; Kawabata, S.; Gotoh, M. Injection of Dental Pulp Stem Cells Promotes Healing of Damaged

Bladder Tissue in a Rat Model of Chemically Induced Cystitis. *Cell Transplant* **2016**, *25*, 425-436, doi:10.3727/096368915x689523.

51. Kim, A.; Yu, H.Y.; Lim, J.; Ryu, C.M.; Kim, Y.H.; Heo, J.; Han, J.Y.; Lee, S.; Bae, Y.S.; Kim, J.Y., et al. Improved efficacy and in vivo cellular properties of human embryonic stem cell derivative in a preclinical model of bladder pain syndrome. *Sci Rep* **2017**, *7*, 8872, doi:10.1038/s41598-017-09330-x.
52. Li, J.; Luo, H.; Dong, X.; Liu, Q.; Wu, C.; Zhang, T.; Hu, X.; Zhang, Y.; Song, B.; Li, L. Therapeutic effect of urine-derived stem cells for protamine/lipopolysaccharide-induced interstitial cystitis in a rat model. *Stem Cell Res Ther* **2017**, *8*, 107, doi:10.1186/s13287-017-0547-9.
53. Kim, B.S.; Chun, S.Y.; Lee, E.H.; Chung, J.W.; Lee, J.N.; Ha, Y.S.; Choi, J.Y.; Song, P.H.; Kwon, T.G.; Han, M.H., et al. Efficacy of combination therapy with pentosan polysulfate sodium and adipose tissue-derived stem cells for the management of interstitial cystitis in a rat model. *Stem Cell Res* **2020**, *45*, 101801, doi:10.1016/j.scr.2020.101801.
54. Inoue, Y.; Kishida, T.; Kotani, S.I.; Akiyoshi, M.; Taga, H.; Seki, M.; Ukimura, O.; Mazda, O. Direct conversion of fibroblasts into urothelial cells that may be recruited to regenerating mucosa of injured urinary bladder. *Sci Rep* **2019**, *9*, 13850, doi:10.1038/s41598-019-50388-6.
55. Ryu, C.M.; Yu, H.Y.; Lee, H.Y.; Shin, J.H.; Lee, S.; Ju, H.; Paulson, B.; Lee, S.; Kim, S.; Lim, J., et al. Longitudinal intravital imaging of transplanted mesenchymal stem cells elucidates their functional integration and therapeutic potency in an animal model of interstitial cystitis/bladder pain syndrome. *Theranostics* **2018**, *8*, 5610-5624, doi:10.7150/thno.27559.
56. Furuta, A.; Yamamoto, T.; Igarashi, T.; Suzuki, Y.; Egawa, S.; Yoshimura, N. Bladder wall injection of mesenchymal stem cells ameliorates bladder inflammation, overactivity, and nociception in a chemically induced interstitial cystitis-like rat model. *Int Urogynecol J* **2018**, *29*, 1615-1622, doi:10.1007/s00192-018-3592-8.
57. Chung, J.W.; Chun, S.Y.; Lee, E.H.; Ha, Y.S.; Lee, J.N.; Song, P.H.; Yoo, E.S.; Kwon, T.G.; Chung, S.K.; Kim, B.S. Verification of mesenchymal stem cell injection therapy for interstitial cystitis in a rat model. *PLoS One* **2019**, *14*, e0226390, doi:10.1371/journal.pone.0226390.
58. Lee, S.W.; Ryu, C.M.; Shin, J.H.; Choi, D.; Kim, A.; Yu, H.Y.; Han, J.Y.; Lee, H.Y.; Lim, J.; Kim, Y.H., et al. The Therapeutic Effect of Human Embryonic Stem Cell-Derived Multipotent Mesenchymal Stem Cells on Chemical-Induced Cystitis in Rats. *Int Neurourol J* **2018**, *22*, S34-45, doi:10.5213/inj.1836014.007.
59. Nassir, A.M.; Ibrahim, I.A.A.; Afify, M.A.; ElSawy, N.A.; Imam, M.T.; Shaheen, M.H.; Basyuni, M.A.; Bader, A.; Azhar, R.A.; Shahzad, N. Olea europaea subsp. Cuspidata and Juniperus procera Hydroalcoholic Leaves' Extracts Modulate Stress Hormones in Stress-Induced Cystitis in Rats. *Urological Science* **2019**, *30*, 151-156, doi:10.4103/urol.Uros\_130\_18.
60. Bazi, T.; Hajj-Hussein, I.A.; Awwad, J.; Shams, A.; Hijaz, M.; Jurjus, A. A modulating effect of epigallocatechin gallate (EGCG), a tea catechin, on the bladder of rats exposed to water avoidance stress. *Neurourol Urodyn* **2013**, *32*, 287-292, doi:10.1002/nau.22288.
61. Li, W.; Yang, F.; Zhan, H.; Liu, B.; Cai, J.; Luo, Y.; Zhou, X. Houttuynia cordata Extract Ameliorates Bladder Damage and Improves Bladder Symptoms via Anti-Inflammatory Effect in Rats with Interstitial Cystitis. *Evid Based Complement Alternat Med* **2020**, *2020*, 9026901, doi:10.1155/2020/9026901.
62. Luo, J.; Yang, C.; Luo, X.; Yang, Y.; Li, J.; Song, B.; Zhao, J.; Li, L. Chlorogenic acid attenuates cyclophosphamide-induced rat interstitial cystitis. *Life Sci* **2020**, *254*, 117590, doi:10.1016/j.lfs.2020.117590.
63. Shih, H.J.; Chang, C.Y.; Lai, C.H.; Huang, C.J. Therapeutic effect of modulating the NLRP3-regulated transforming growth factor- $\beta$  signaling pathway on interstitial cystitis/bladder pain syndrome. *Biomedicine and Pharmacotherapy* **2021**, *138*, doi:10.1016/j.biopha.2021.111522.
64. Liu, Y.C.; Lee, W.T.; Liang, C.C.; Lo, T.S.; Hsieh, W.C.; Lin, Y.H. Beneficial effect of Bletilla striata extract solution on zymosan-induced interstitial cystitis in rat. *Neurourology and Urodynamics* **2021**, *40*, 763-770, doi:10.1002/nau.24630.
65. Ostardo, E.; Impellizzeri, D.; Cervigni, M.; Porru, D.; Sommariva, M.; Cordaro, M.; Siracusa, R.; Fusco, R.; Gugliandolo, E.; Crupi, R., et al. Adelmidrol plus sodium hyaluronate in IC/BPS or conditions associated to chronic urothelial inflammation. A translational study. *Pharmacological Research* **2018**, *134*, 16-30, doi:10.1016/j.phrs.2018.05.013.
66. Li, H.; Zhang, Z.; Peng, J.; Xin, Z.; Li, M.; Yang, B.; Fang, D.; Tang, Y.; Guo, Y. Treatment with low-energy shock wave alleviates pain in an animal model of uroplakin 3A-induced

- autoimmune interstitial cystitis/painful bladder syndrome. *Investig Clin Urol* **2019**, *60*, 359-366, doi:10.4111/icu.2019.60.5.359.
67. Wang, H.J.; Lee, W.C.; Tyagi, P.; Huang, C.C.; Chuang, Y.C. Effects of low energy shock wave therapy on inflammatory molecules, bladder pain, and bladder function in a rat cystitis model. *Neurourol Urodyn* **2017**, *36*, 1440-1447, doi:10.1002/nau.23141.
  68. Kouzoukas, D.E.; Meyer-Siegler, K.L.; Ma, F.; Westlund, K.N.; Hunt, D.E.; Vera, P.L. Macrophage Migration Inhibitory Factor Mediates PAR-Induced Bladder Pain. *PLoS One* **2015**, *10*, e0127628, doi:10.1371/journal.pone.0127628.
  69. Kouzoukas, D.E.; Ma, F.; Meyer-Siegler, K.L.; Westlund, K.N.; Hunt, D.E.; Vera, P.L. Protease-Activated Receptor 4 Induces Bladder Pain through High Mobility Group Box-1. *PLoS One* **2016**, *11*, e0152055, doi:10.1371/journal.pone.0152055.
  70. Bosco, G.; Ostardo, E.; Rizzato, A.; Garetto, G.; Paganini, M.; Melloni, G.; Giron, G.; Pietrosanti, L.; Martinelli, I.; Camporesi, E. Clinical and morphological effects of hyperbaric oxygen therapy in patients with interstitial cystitis associated with fibromyalgia. *BMC Urol* **2019**, *19*, 108, doi:10.1186/s12894-019-0545-6.
  71. Irie, Y.; Tsubota, M.; Maeda, M.; Hiramoto, S.; Sekiguchi, F.; Ishikura, H.; Wake, H.; Nishibori, M.; Kawabata, A. HMGB1 and its membrane receptors as therapeutic targets in an intravesical substance P-induced bladder pain syndrome mouse model. *J Pharmacol Sci* **2020**, *143*, 112-116, doi:10.1016/j.jphs.2020.03.002.
  72. Tanaka, J.; Yamaguchi, K.; Ishikura, H.; Tsubota, M.; Sekiguchi, F.; Seki, Y.; Tsujiuchi, T.; Murai, A.; Umemura, T.; Kawabata, A. Bladder pain relief by HMGB1 neutralization and soluble thrombomodulin in mice with cyclophosphamide-induced cystitis. *Neuropharmacology* **2014**, *79*, 112-118, doi:10.1016/j.neuropharm.2013.11.003.
  73. Beckel, J.M.; Daugherty, S.L.; Tyagi, P.; Wolf-Johnston, A.S.; Birder, L.A.; Mitchell, C.H.; de Groat, W.C. Pannexin 1 channels mediate the release of ATP into the lumen of the rat urinary bladder. *Journal of Physiology-London* **2015**, *593*, 1857-1871, doi:10.1113/jphysiol.2014.283119.
  74. Aronsson, P.; Johnsson, M.; Vesela, R.; Winder, M.; Tobin, G. Adenosine receptor antagonism suppresses functional and histological inflammatory changes in the rat urinary bladder. *Auton Neurosci* **2012**, *171*, 49-57, doi:10.1016/j.autneu.2012.10.006.
  75. Ko, I.G.; Jin, J.J.; Hwang, L.; Kim, S.H.; Kim, C.J.; Won, K.Y.; Na, Y.G.; Kim, K.H.; Kim, S.J. Adenosine A(2A) Receptor Agonist Polydeoxyribonucleotide Alleviates Interstitial Cystitis-Induced Voiding Dysfunction by Suppressing Inflammation and Apoptosis in Rats. *J Inflamm Res* **2021**, *14*, 367-378, doi:10.2147/jir.S287346.
  76. DeBerry, J.J.; Saloman, J.L.; Dragoo, B.K.; Albers, K.M.; Davis, B.M. Artemin Immunotherapy Is Effective in Preventing and Reversing Cystitis-Induced Bladder Hyperalgesia via TRPA1 Regulation. *J Pain* **2015**, *16*, 628-636, doi:10.1016/j.jpain.2015.03.014.
  77. Merrill, L.; Vizzard, M.A. Intravesical TRPV4 blockade reduces repeated variate stress-induced bladder dysfunction by increasing bladder capacity and decreasing voiding frequency in male rats. *Am J Physiol Regul Integr Comp Physiol* **2014**, *307*, R471-480, doi:10.1152/ajpregu.00008.2014.
  78. Kawasaki, S.; Soga, M.; Sakurai, Y.; Nanchi, I.; Yamamoto, M.; Imai, S.; Takahashi, T.; Tsuno, N.; Asaki, T.; Morioka, Y., et al. Selective blockade of transient receptor potential vanilloid 4 reduces cyclophosphamide-induced bladder pain in mice. *Eur J Pharmacol* **2021**, *10.1016/j.ejphar.2021.174040*, 174040, doi:10.1016/j.ejphar.2021.174040.
  79. Hou, Y.; Li, H.; Huo, W. MicroRNA-495 alleviates ulcerative interstitial cystitis via inactivating the JAK-STAT signaling pathway by inhibiting JAK3. *Int Urogynecol J* **2021**, *10.1007/s00192-020-04593-x*, doi:10.1007/s00192-020-04593-x.
  80. Song, Y.J.; Cao, J.Y.; Jin, Z.; Hu, W.G.; Wu, R.H.; Tian, L.H.; Yang, B.; Wang, J.; Xiao, Y.; Huang, C.B. Inhibition of microRNA-132 attenuates inflammatory response and detrusor fibrosis in rats with interstitial cystitis via the JAK-STAT signaling pathway. *J Cell Biochem* **2019**, *120*, 9147-9158, doi:10.1002/jcb.28190.
  81. Wang, Z.Y.; Wang, P.; Bjorling, D.E. Activation of cannabinoid receptor 2 inhibits experimental cystitis. *Am J Physiol Regul Integr Comp Physiol* **2013**, *304*, R846-853, doi:10.1152/ajpregu.00585.2012.
  82. Wang, Z.Y.; Wang, P.; Bjorling, D.E. Treatment with a cannabinoid receptor 2 agonist decreases severity of established cystitis. *J Urol* **2014**, *191*, 1153-1158, doi:10.1016/j.juro.2013.10.102.
  83. Tambaro, S.; Casu, M.A.; Mastinu, A.; Lazzari, P. Evaluation of selective cannabinoid CB(1) and CB(2) receptor agonists in a mouse model of lipopolysaccharide-induced interstitial cystitis. *Eur J Pharmacol* **2014**, *729*, 67-74, doi:10.1016/j.ejphar.2014.02.013.

84. Berger, G.; Arora, N.; Burkovskiy, I.; Xia, Y.F.; Chinnadurai, A.; Westhofen, R.; Hagn, G.; Cox, A.; Kelly, M.; Zhou, J., et al. Experimental Cannabinoid 2 Receptor Activation by Phyto-Derived and Synthetic Cannabinoid Ligands in LPS-Induced Interstitial Cystitis in Mice. *Molecules* **2019**, *24*, doi:10.3390/molecules24234239.
85. Pessina, F.; Capasso, R.; Borrelli, F.; Aveta, T.; Buono, L.; Valacchi, G.; Fiorenzani, P.; Di Marzo, V.; Orlando, P.; Izzo, A.A. Protective effect of palmitoylethanolamide in a rat model of cystitis. *J Urol* **2015**, *193*, 1401-1408, doi:10.1016/j.juro.2014.11.083.
86. Liu, Q.; Wu, Z.; Liu, Y.; Chen, L.; Zhao, H.; Guo, H.; Zhu, K.; Wang, W.; Chen, S.; Zhou, N., et al. Cannabinoid receptor 2 activation decreases severity of cyclophosphamide-induced cystitis via regulating autophagy. *Neurourol Urodyn* **2020**, *39*, 158-169, doi:10.1002/nau.24205.
87. Shimizu, N.; De Velasco, M.A.; Umekawa, T.; Uemura, H.; Yoshikawa, K. Effects of the Rho kinase inhibitor, hydroxyfasudil, on bladder dysfunction and inflammation in rats with HCl-induced cystitis. *Int J Urol* **2013**, *20*, 1136-1143, doi:10.1111/iju.12119.
88. de Oliveira, M.G.; Calmasini, F.B.; Alexandre, E.C.; De Nucci, G.; Mónica, F.Z.; Antunes, E. Activation of soluble guanylyl cyclase by BAY 58-2667 improves bladder function in cyclophosphamide-induced cystitis in mice. *Am J Physiol Renal Physiol* **2016**, *311*, F85-93, doi:10.1152/ajprenal.00041.2016.
89. Liu, M.; Shen, S.; Kendig, D.M.; Mahavadi, S.; Murthy, K.S.; Grider, J.R.; Qiao, L.Y. Inhibition of NMDAR reduces bladder hypertrophy and improves bladder function in cyclophosphamide induced cystitis. *J Urol* **2015**, *193*, 1676-1683, doi:10.1016/j.juro.2014.12.092.
90. Lai, H.H.; Shen, B.; Vijairania, P.; Zhang, X.; Vogt, S.K.; Gereau, R.W.t. Anti-vascular endothelial growth factor treatment decreases bladder pain in cyclophosphamide cystitis: a Multidisciplinary Approach to the Study of Chronic Pelvic Pain (MAPP) Research Network animal model study. *BJU Int* **2017**, *120*, 576-583, doi:10.1111/bju.13924.
91. Chen, Y.H.; Man, K.M.; Chen, W.C.; Liu, P.L.; Tsai, K.S.; Tsai, M.Y.; Wu, Y.T.; Chen, H.Y. Platelet-Rich Plasma Ameliorates Cyclophosphamide-Induced Acute Interstitial Cystitis/Painful Bladder Syndrome in a Rat Model. *Diagnostics (Basel)* **2020**, *10*, doi:10.3390/diagnostics10060381.
92. Majima, T.; Tyagi, P.; Dogishi, K.; Kashyap, M.; Funahashi, Y.; Gotoh, M.; Chancellor, M.B.; Yoshimura, N. Effect of Intravesical Liposome-Based Nerve Growth Factor Antisense Therapy on Bladder Overactivity and Nociception in a Rat Model of Cystitis Induced by Hydrogen Peroxide. *Hum Gene Ther* **2017**, *28*, 598-609, doi:10.1089/hum.2016.121.
93. Hu, V.Y.; Zvara, P.; Dattilio, A.; Redman, T.L.; Allen, S.J.; Dawbarn, D.; Stroemer, R.P.; Vizzard, M.A. Decrease in bladder overactivity with REN1820 in rats with cyclophosphamide induced cystitis. *J Urol* **2005**, *173*, 1016-1021, doi:10.1097/01.ju.0000155170.15023.e5.
94. Tyagi, P.; Banerjee, R.; Basu, S.; Yoshimura, N.; Chancellor, M.; Huang, L. Intravesical antisense therapy for cystitis using TAT-peptide nucleic acid conjugates. *Mol Pharm* **2006**, *3*, 398-406, doi:10.1021/mp050093x.
95. Zeybek, A.; Sağlam, B.; Cikler, E.; Cetinel, S.; Ercan, F.; Sener, G. Taurine ameliorates stress-induced degeneration of the urinary bladder. *Acta Histochem* **2007**, *109*, 208-214, doi:10.1016/j.acthis.2006.12.001.
96. Benigni, F.; Baroni, E.; Zecevic, M.; Zvara, P.; Streng, T.; Hedlund, P.; Colli, E.; D'Ambrosio, D.; Andersson, K.E. Oral treatment with a vitamin D3 analogue (BXL628) has anti-inflammatory effects in rodent model of interstitial cystitis. *BJU Int* **2006**, *97*, 617-624, doi:10.1111/j.1464-410X.2006.05971.x.
97. Akin, Y.; Bozkurt, A.; Erol, H.S.; Halici, M.; Celebi, F.; Kapakin, K.A.; Gulmez, H.; Ates, M.; Coban, A.; Nuhoglu, B. Impact of Rho-Kinase Inhibitor Hydroxyfasudil in Protamine Sulphate Induced Cystitis Rat Bladder. *Low Urin Tract Symptoms* **2015**, *7*, 108-114, doi:10.1111/luts.12058.
98. Zhang, X.; He, H.; Lu, G.; Xu, T.; Qin, L.; Wang, X.; Jin, X.; Liu, B.; Zhao, Z.; Shen, Z., et al. Specific inhibition of ICAM-1 effectively reduces bladder inflammation in a rat model of severe non-bacterial cystitis. *Sci Rep* **2016**, *6*, 35672, doi:10.1038/srep35672.
99. Minami, A.; Tanaka, T.; Otoshi, T.; Kuratsukuri, K.; Nakatani, T. Hyperbaric oxygen significantly improves frequent urination, hyperalgesia, and tissue damage in a mouse long-lasting cystitis model induced by an intravesical instillation of hydrogen peroxide. *Neurourol Urodyn* **2019**, *38*, 97-106, doi:10.1002/nau.23822.
100. Mahal, A.; Young-Lin, N.; Dobberfuhr, A.; Estes, J.; Comiter, C.V. Peroxisome proliferator-activated receptor gamma agonist as a novel treatment for interstitial cystitis: A rat model. *Investig Clin Urol* **2018**, *59*, 257-262, doi:10.4111/icu.2018.59.4.257.
